# Supplementary material for: Chlorophyll a Fluorescence as a Tool in Evaluating the Effects of ABA Content and Ethylene Inhibitors on Quality of Flowering Potted Bougainvillea
Source: ScientificWorldJournal. 2012 Jan 4;2012:684747. doi: 10.1100/2012/684747 (PMC3259607; doi:10.1100/2012/684747)
Supplement: Supplementary file 1 — Supporting material : The JIP analysis and derived indices calculated on the intermediate steps of chlorophyll a fluorescence measured on Bougainvillea cultivars treated with AOA or 1-MCP and stored at 14°C for one week in dark. The recovery ability was evaluated by keeping the pants in growth chamber for one week at 20°C. Mean values are accompanied by standard errors (n=5). Data were subjected to two-way ANOVA and different letters mean that values are statistically different P<0.05. [file 684747.f1.xls]

## Sheet: Legend
Experiments: the Bouganvillea cultivars were treated with AOA or 1-MCP and stored at 14 °C for one week in dark. The recovery ability was evaluated by keeping the pants in growth chamber for one week at 20 °C.
JIP Don Mario: the main fluorescence indexes derived from JIP of cv. Don Mario are riported, except those inserted in the manuscript
JIP Rosenka: the main fluorescence indexes derived from JIP of cv. Rosenka are riported, except those inserted in the manuscript
Rosenka 2006 and 2007: raw fluorescence data
Don Mario 2006 and 2007: raw fluorescence data

## Sheet: JIP Don Mario
		Phenomenological : for each measuring area (cross section)
	TRo/CS				DIo/CS
	Control	AOA	1-MCP		Control	AOA	1-MCP				TRo/CS=trapped energy flux per cross section (at t=0)
0	522.976	522.976	522.976		125.191	125.191	125.191				Eto/CS=electron transport flux per cross section (at t=0)
7S	588.42	493.598	528.508		197.358	252.402	232.592				DIo/CS=dissipated energy flux per cross section (at t=0)
3R	533.143	547.257	540.122		104.057	120.243	114.211
7R	534.52	565.276	566.031		108.48	121.349	121.469
		S.D.				S.D.					S.D.= Standard deviation
	39.4593	39.4593	39.4593		35.817	35.817	35.817
	75.7815	145.286	48.1109		55.6773	99.1185	118.221
	38.7932	44.7777	48.0584		14.9431	20.5964	20.8181
	36.213	48.5392	59.3566		14.601	20.5526	29.2393
		P value summary	Significant?			P value summary	Significant?
	Interaction	*	Yes		Interaction	ns	No
	Treatments	ns	No		Treatments	ns	No
	Time	ns	No		Time	***	Yes
		Specific energy fluxes for each reaction center
	ABS/RC				TRo/RC				ETo/RC
	Control	AOA	1-MCP		Control	AOA	1-MCP		Control	AOA	1-MCP			PI_abs= performance index on the absorbance basis
0	14.1289	14.1289	14.1289		11.4469	11.4469	11.4469		10.7446	10.7446	10.7446			ABS/RC=absorption flux per RC
7S	14.3849	17.3891	16.078		10.8313	10.759	11.1641		10.1198	9.98068	10.4268			TRo/RC=trapped energy flux per RC (at t=0)
3R	14.3331	13.8333	14.3504		12.0049	11.3578	11.8638		11.304	10.6096	11.1041			Eto/RC=electron transport flux per RC (at t=0)
7R	14.5146	14.1156	14.175		12.0711	11.6387	11.7091		11.4378	10.8637	10.9182			DIo/RC=dissipated energy flux per RC (at t=0)
		S.D.				S.D.				S.D.
	0.330038	0.330038	0.330038		0.560641	0.560641	0.560641		0.727843	0.727843	0.727843
	0.339036	4.88531	2.117		0.612695	0.398504	0.63752		0.715637	0.344333	0.734031
	0.518006	0.205668	0.526208		0.528277	0.296475	0.566095		0.795914	0.442509	0.714721
	0.521586	0.56853	0.789046		0.392898	0.563356	0.873379		0.436496	0.688013	1.07897
		P value	Significant?			P value	Significant?			P value summary	Significant?
	Treatments	ns	No		Treatments	ns	No		Treatments	ns	No
	Column Factor	ns	No		Column Factor	ns	No		Column Factor	ns	No
	Time	**	Yes		Time	**	Yes		Time	***	Yes
	Fluorescence parameters derived
	Vj				Mo				Fo/Fm				PI_abs
	Control	AOA	1-MCP		Control	AOA	1-MCP		Control	AOA	1-MCP		Control	AOA	1-MCP
0	0.0620813	0.0620813	0.0620813		0.702293	0.702293	0.702293		0.189899	0.189899	0.189899		5.52092	5.52092	5.52092
7S	0.0662252	0.0721972	0.0666041		0.71152	0.778323	0.737262		0.247246	0.345586	0.294285		3.40946	1.8734	2.73018
3R	0.0594028	0.0662023	0.0646887		0.700895	0.748114	0.75968		0.162646	0.17902	0.173516		6.49472	4.98342	5.16569
7R	0.0526108	0.0671613	0.069131		0.633293	0.775062	0.790952		0.168182	0.175644	0.174738		6.35409	4.97629	5.05594
																		VJ=relative variable fluorescecne at the J-step
		S.D.				S.D.				S.D.				S.D.				Mo=approximated initial slope (in ms-1) of the fluorescence transient V = f(t)
	0.0219516	0.0219516	0.0219516		0.221676	0.221676	0.221676		0.0327524	0.0327524	0.0327524		2.79008	2.79008	2.79008			Fo/Fm= quantum yield of electron transport (at t=0)
	0.0212195	0.0115748	0.0185505		0.206968	0.13665	0.18074		0.0337063	0.153222	0.10143		1.34918	1.00863	1.51773
	0.0290737	0.0151309	0.0170845		0.292855	0.150117	0.165332		0.00916098	0.0137825	0.0144328		1.92556	1.4204	1.45772
	0.00759577	0.0154772	0.0252773		0.0783005	0.150919	0.217347		0.0127843	0.0126674	0.0181261		1.45512	1.7017	1.71122
		P value summary	Significant?			P value summary	Significant?			P value summary	Significant?			P value summary	Significant?
	Interaction	ns	No		Interaction	ns	No		Interaction	ns	No		Interaction	ns	No
	Treatments	ns	No		Treatments	ns	No		Treatments	*	Yes		Treatments	ns	No
	Time	ns	No		Time	ns	No		Time	***	Yes		Time	***	Yes

## Sheet: JIP Rosenka
	Phenomenological : for each measuring area (cross section)
	TRo/CS					DIo/CS
	Control	AOA	1-MCP			Control	AOA	1-MCP		TRo/CS=trapped energy flux per cross section (at t=0)
0	534.229	534.229	534.229			181.521	181.521	181.521		Eto/CS=electron transport flux per cross section (at t=0)
7S	530.145	536.945	525.176			161.141	168.944	209.158		DIo/CS=dissipated energy flux per cross section (at t=0)
3R	505.4	484.95	523.322			110.475	106.596	131.345
7R	562.377	500.493	506.368			140.956	115.078	118.076
		S.D.					S.D.			S.D.= Standard deviation
	49.6434	49.6434	49.6434			67.8881	67.8881	67.8881
	21.9543	56.1622	54.8569			32.6276	38.4538	86.931
	27.1089	33.5315	44.1426			19.9967	18.5591	29.0144
	63.5476	37.0494	34.154			41.0399	11.3316	18.0055
		P value summary	Significant?				P value summary	Significant?
	Interaction	ns	No			Interaction	ns	No
	Treatments	ns	No			Treatments	ns	No
	Time	ns	No			Time	***	Yes
	Specific energy fluxes for each reaction center
	ABS/RC				TRo/RC				ETo/RC
	Control	AOA	1-MCP		Control	AOA	1-MCP		Control	AOA	1-MCP		PI_abs= performance index on the absorbance basis
0	15.0032	15.0032	15.0032		11.2825	11.2825	11.2825		10.362	10.362	10.362		ABS/RC=absorption flux per RC
7S	14.167	14.1759	16.0318		10.8806	10.8162	11.5051		10.2906	10.1934	10.7254		TRo/RC=trapped energy flux per RC (at t=0)
3R	14.4149	14.7036	13.5767		11.8534	12.0766	10.9013		11.184	11.4496	9.99617		Eto/RC=electron transport flux per RC (at t=0)
7R	13.9261	15.1358	14.5948		11.1902	12.3062	11.8536		10.2523	11.6095	11.0758		DIo/RC=dissipated energy flux per RC (at t=0)
	0.608352	0.608352	0.608352		0.656152	0.656152	0.656152		0.874161	0.874161	0.874161
	0.358316	0.640995	1.21666		0.34927	0.590759	0.695254		0.378702	0.613701	0.80508
	0.553941	0.600642	1.47464		0.682622	0.679402	1.46375		0.71529	0.732212	1.68276
	0.873415	0.59465	1.05691		0.989331	0.385136	0.940977		1.27643	0.394458	1.09832
		P value summary	Significant?			P value summary	Significant?			P value summary	Significant?
	Interaction	***	Yes		Interaction	**	Yes		Interaction	**	Yes
	Treatments	*	Yes		Treatments	ns	No		Treatments	ns	No
	Time	**	Yes		Time	**	Yes		Time	*	Yes
	Fluorescence parameters derived
	Vj				Mo				Fo/Fm				PI_abs
	Control	AOA	1-MCP		Control	AOA	1-MCP		Control	AOA	1-MCP		Control	AOA	1-MCP
0	0.0827969	0.0827969	0.0827969		0.920443	0.920443	0.920443		0.246564	0.246564	0.246564		2.95244	2.95244	2.95244
7S	0.0543228	0.0577964	0.0684543		0.589938	0.622755	0.779716		0.231506	0.236712	0.27715		4.32938	4.02201	3.05755
3R	0.0567637	0.0522631	0.0865366		0.669374	0.627037	0.905093		0.178314	0.179207	0.19877		5.53959	5.96426	3.76792
7R	0.086377	0.0566571	0.0669766		0.937909	0.696739	0.777805		0.197429	0.186791	0.188257		3.66179	4.94693	4.49185
																		VJ=relative variable fluorescecne at the J-step
																		Mo=approximated initial slope (in ms-1) of the fluorescence transient V = f(t)
	0.0276318	0.0276318	0.0276318		0.266551	0.266551	0.266551		0.0546634	0.0546634	0.0546634		1.89522	1.89522	1.89522			Fo/Fm= quantum yield of electron transport (at t=0)
	0.00803778	0.00885191	0.017935		0.0814229	0.0877583	0.174933		0.0306787	0.0311111	0.0860984		1.36818	1.74918	2.38005
	0.00988934	0.0108781	0.0385319		0.100857	0.112499	0.29757		0.0175335	0.017175	0.0246982		1.29127	1.54268	1.73512
	0.0354879	0.0090442	0.0212513		0.291498	0.10796	0.179049		0.0248763	0.00900905	0.0140917		1.65495	1.09139	1.3463
		P value summary	Significant?			P value summary	Significant?			P value summary	Significant?			P value summary	Significant?
	Interaction	*	Yes		Interaction	ns	No		Interaction	ns	No		Interaction	ns	No
	Treatments	*	Yes		Treatments	*	Yes		Treatments	ns	No		Treatments	ns	No
	Time	**	Yes		Time	***	Yes		Time	***	Yes		Time	***	Yes

## Sheet: Rosenka2007
																					Phenomenogical indexes							Specific energy fluxes per RC
Date	Time	ID	Treatment	Fo	Fm	Fv	Fv/Fm	Tfm ms	Area	T1 ms	F1	T2 ms	F2	T3 ms	F3	T4 ms	F4	T5 ms	F5	P.I.	ABS/CS	TRo/CS	ETo/CS	DIo/CS	RC/CSo	RC/CSm	Fo/Fm	ABS/RC	TRo/RC	ETo/RC	DIo/RC	ETo/TRo	RC/ABS	Fv/Fo	PI_abs	Vj	Mo	Yo/1-Yo	Yo=Eto/Tro=(1-Vj)
2007-05-23	0	Rosenka	Control	688	2908	2220	0.763	300	46800	0.05	771	0.1	852	0.3	1168	2	1956	30	2409	1.221	688	525.227	225.232	162.773	346.869	1466.12	0.236589	15.3438	11.7073	10.8425	3.63648	0.926126	0.0651729	3.22674	2.6364	0.0738739	0.864865	12.5366	0.926126
2007-05-23	0	Rosenka	Control	803	2468	1665	0.675	300	34200	0.05	889	0.1	979	0.3	1267	2	1815	30	2183	0.492	803	541.732	212.463	261.268	295.384	907.856	0.325365	15.6229	10.5455	9.43074	5.07744	0.894294	0.0640086	2.07347	1.12284	0.105706	1.11471	8.46023	0.894294
2007-05-23	0	Rosenka	Control	895	2695	1800	0.668	300	31600	0.05	1020	0.1	1141	0.3	1542	2	2247	30	2417	0.233	895	597.774	148.779	297.226	312.284	940.34	0.332096	15.749	10.5203	9.08255	5.22866	0.863333	0.0634961	2.01117	0.806701	0.136667	1.43778	6.31707	0.863333
2007-05-23	0	Rosenka	Control	679	3532	2853	0.808	260	44800	0.05	778	0.1	870	0.3	1246	2	2136	30	3036	2.089	679	548.467	268.37	130.533	352.344	1832.81	0.192242	14.696	11.8743	11.0794	2.82163	0.933053	0.0680459	4.20177	3.98482	0.0669471	0.794953	13.9372	0.933053
2007-05-23	0	Rosenka	Control	692	2893	2201	0.761	280	38600	0.05	783	0.1	871	0.3	1182	2	1788	30	2496	1.364	692	526.475	264.314	165.525	294.396	1230.76	0.239198	14.3886	10.9497	10.0592	3.43887	0.918673	0.0694995	3.18064	2.49703	0.0813267	0.890504	11.2961	0.918673
2007-05-23	0	Rosenka	Control	926	2625	1699	0.647	290	29400	0.05	1036	0.1	1151	0.3	1514	2	2123	30	2371	0.253	926	599.342	177.086	326.658	305.023	864.67	0.352762	16.1566	10.4533	9.06899	5.70329	0.867569	0.0618941	1.83477	0.743955	0.132431	1.38434	6.55111	0.867569
2007-05-23	0	Rosenka	Control	857	2979	2122	0.712	290	32200	0.05	972	0.1	1091	0.3	1486	2	2256	30	2635	0.507	857	610.458	207.993	246.542	339.44	1179.92	0.28768	15.1013	10.7521	9.56646	4.34918	0.889727	0.0662194	2.47608	1.32293	0.110273	1.18567	8.06838	0.889727
2007-05-23	0	Rosenka	Control	666	3089	2423	0.784	290	46600	0.05	751	0.1	833	0.3	1152	2	1926	30	2495	1.707	666	522.408	250.747	143.592	338.598	1570.46	0.215604	14.8479	11.6407	10.8384	3.20714	0.931077	0.0673498	3.63814	3.31008	0.0689228	0.802311	13.509	0.931077
2007-05-23	0	Rosenka	Control	558	3030	2472	0.816	280	48000	0.05	621	0.1	677	0.3	927	2	1618	30	2443	3.458	558	455.24	260.032	102.76	326.934	1775.29	0.184158	15.2002	12.4034	11.8063	2.79684	0.951861	0.0657886	4.43011	5.76289	0.0481392	0.597087	19.7731	0.951861
2007-05-23	0	Rosenka	Control	723	2933	2210	0.753	260	38800	0.05	816	0.1	905	0.3	1223	2	1911	30	2487	1.177	723	544.777	251.928	178.223	323.597	1312.74	0.246505	14.5936	10.989	10.084	3.60463	0.917647	0.068523	3.05671	2.33393	0.0823529	0.904977	11.1429	0.917647
2007-05-23	0	Rosenka	Control	718	3475	2757	0.793	260	35200	0.05	841	0.1	954	0.3	1391	2	2242	30	3075	1.395	718	569.648	254.761	148.352	322.49	1560.8	0.206619	14.3843	11.4068	10.4304	2.97756	0.9144	0.0695201	3.83983	2.85157	0.0856003	0.976424	10.6822	0.9144
2007-05-23	0	Rosenka	Control	571	3386	2815	0.831	250	53600	0.05	632	0.1	687	0.3	933	2	1594	30	2713	5.072	571	474.709	302.195	96.291	335.378	1988.77	0.168636	15.0214	12.4828	11.9684	2.53861	0.958792	0.0665718	4.92995	7.63621	0.0412078	0.514387	23.2672	0.958792
2007-05-23	0	Rosenka	Control	740	3088	2348	0.76	290	40200	0.05	838	0.1	937	0.3	1263	2	1920	30	2685	1.347	740	562.668	279.896	177.332	317.375	1324.4	0.239637	13.9727	10.6193	9.72832	3.35346	0.916099	0.0715679	3.17297	2.47947	0.0839012	0.890971	10.9188	0.916099
2007-05-23	0	Rosenka	Control	625	2393	1768	0.739	700	43000	0.05	684	0.1	742	0.3	945	2	1485	30	1931	1.483	625	461.763	237.15	163.237	310.247	1187.88	0.261178	14.804	10.9402	10.2162	3.86385	0.933824	0.0675492	2.8288	2.6964	0.0661765	0.723982	14.1111	0.933824
2007-05-23	0	Rosenka	Control	578	2911	2333	0.801	290	50400	0.05	638	0.1	697	0.3	921	2	1536	30	2332	3.242	578	463.234	273.016	114.766	323.453	1629.02	0.198557	14.3938	11.5294	10.9413	2.86436	0.948993	0.0694745	4.03633	5.21727	0.0510073	0.588084	18.605	0.948993
2007-05-23	0	Rosenka	Control	733	2839	2106	0.742	270	30800	0.05	830	0.1	923	0.3	1289	2	2164	30	2479	0.647	733	543.747	174.278	189.253	349.866	1355.08	0.25819	15.7753	11.7053	10.6492	4.07002	0.909782	0.0633903	2.87312	1.83662	0.0902184	1.05603	10.0842	0.909782
2007-05-31	8	Rosenka	Control	741	2919	2178	0.746	700	82200	0.05	802	0.1	866	0.3	1061	2	1551	30	2319	2.344	741	552.894	347.272	188.106	349.878	1378.27	0.253854	13.7265	10.24	9.6523	3.48654	0.942608	0.0728516	2.93927	3.51688	0.0573921	0.587695	16.424	0.942608
2007-05-31	8	Rosenka	Control	765	2632	1867	0.709	900	84000	0.05	824	0.1	882	0.3	1073	2	1533	30	2063	1.544	765	542.65	319.428	222.35	338.275	1163.84	0.290653	14.8518	10.5299	9.87003	4.32187	0.937333	0.067332	2.44052	2.45786	0.0626674	0.659882	14.9573	0.937333
2007-05-31	8	Rosenka	Control	703	3199	2496	0.78	600	74400	0.05	764	0.1	825	0.3	1041	2	1637	30	2605	3.201	703	548.511	343.259	154.489	378.927	1724.31	0.219756	14.2077	11.082	10.5403	3.12568	0.951122	0.0703846	3.5505	4.86282	0.0488782	0.541667	19.459	0.951122
2007-05-31	8	Rosenka	Control	688	3290	2602	0.791	700	68400	0.05	761	0.1	836	0.3	1097	2	1781	30	2772	2.759	688	544.126	315.56	143.874	363.527	1738.38	0.209119	13.9748	11.0541	10.4253	2.92073	0.943121	0.0715575	3.78198	4.48732	0.0568793	0.628747	16.5811	0.943121
2007-05-31	8	Rosenka	Control	659	3076	2417	0.786	600	63000	0.05	725	0.1	793	0.3	1030	2	1680	30	2575	2.711	659	517.816	299.078	141.184	356.26	1662.91	0.214239	14.0899	11.0746	10.4606	3.01523	0.944559	0.070973	3.66768	4.43492	0.0554406	0.613984	17.0373	0.944559
2007-05-31	8	Rosenka	Control	630	3072	2442	0.795	700	71400	0.05	677	0.1	725	0.3	894	2	1402	30	2494	4.873	630	500.801	342.48	129.199	366.116	1785.25	0.205078	13.9821	11.1158	10.6834	2.86634	0.961097	0.0715199	3.87619	6.84891	0.0389025	0.432432	24.7053	0.961097
2007-05-31	8	Rosenka	Control	653	2866	2213	0.772	700	67200	0.05	721	0.1	786	0.3	1021	2	1598	30	2326	2.254	653	504.218	288.906	148.782	323.7	1420.71	0.227844	14.3364	11.0677	10.4025	3.26869	0.939901	0.0697527	3.38897	3.69693	0.0600994	0.66516	15.6391	0.939901
2007-05-31	8	Rosenka	AOA	725	3325	2600	0.782	600	72600	0.05	810	0.1	895	0.3	1184	2	1841	30	2716	2.267	725	566.917	323.579	158.083	344.597	1580.39	0.218045	13.8107	10.8	10.0938	3.01074	0.934615	0.0724074	3.58621	3.71172	0.0653846	0.706154	14.2941	0.934615
2007-05-31	8	Rosenka	AOA	751	2667	1916	0.718	600	66000	0.05	808	0.1	870	0.3	1067	2	1545	30	2111	1.627	751	539.526	315.944	211.474	338.911	1203.56	0.28159	14.7937	10.6218	9.96214	4.17181	0.937891	0.0675965	2.55126	2.60424	0.0621086	0.659708	15.1008	0.937891
2007-05-31	8	Rosenka	AOA	703	2800	2097	0.749	600	54600	0.05	767	0.1	831	0.3	1061	2	1661	30	2326	1.777	703	526.497	285.97	176.503	352.223	1402.88	0.251071	14.9366	11.1875	10.5046	3.74908	0.93896	0.0669497	2.98293	3.07205	0.0610396	0.68288	15.3828	0.93896
2007-05-31	8	Rosenka	AOA	630	2571	1941	0.755	600	69600	0.05	688	0.1	745	0.3	948	2	1482	30	2092	1.991	630	475.624	266.849	154.376	318.579	1300.1	0.245041	14.6502	11.0609	10.4055	3.58929	0.940752	0.0682586	3.08095	3.33922	0.0592478	0.655332	15.8783	0.940752
2007-05-31	8	Rosenka	AOA	647	2907	2260	0.777	600	72200	0.05	701	0.1	753	0.3	949	2	1538	30	2347	3.078	647	503	304.693	144	371.004	1666.94	0.222566	14.667	11.3962	10.8617	3.27073	0.953097	0.0681805	3.49304	4.83954	0.0469027	0.534513	20.3208	0.953097
2007-05-31	8	Rosenka	AOA	802	3149	2347	0.745	700	68400	0.05	869	0.1	941	0.3	1138	2	1589	30	2654	2.532	802	597.743	397.307	204.257	350.018	1374.32	0.254684	12.9786	9.66906	9.09642	3.30955	0.940775	0.0770499	2.92643	3.58175	0.0592245	0.572646	15.8849	0.940775
2007-05-31	8	Rosenka	AOA	538	3123	2585	0.828	700	78000	0.05	590	0.1	640	0.3	832	2	1455	30	2486	5.641	538	445.319	287.347	92.681	347.242	2015.68	0.17227	13.9244	11.5294	11.0745	2.395	0.960542	0.0718163	4.80483	8.39998	0.0394584	0.454932	24.3431	0.960542
2007-05-31	8	Rosenka	AOA	725	3164	2439	0.771	700	63400	0.05	806	0.1	887	0.3	1166	2	1849	30	2732	1.933	725	558.873	301.32	166.127	356.107	1554.1	0.22914	14.1231	10.8889	10.1656	3.23418	0.933579	0.0708061	3.36414	3.34806	0.0664207	0.723247	14.0556	0.933579
2007-05-31	8	Rosenka	AOA	832	3250	2418	0.744	700	73600	0.05	901	0.1	978	0.3	1204	2	1743	30	2660	2.19	832	619.008	385.792	212.992	378.976	1480.38	0.256	13.6986	10.1918	9.5764	3.50685	0.93962	0.073	2.90625	3.3015	0.0603805	0.615385	15.5616	0.93962
2007-05-31	8	Rosenka	1-MCP	756	3780	3024	0.8	500	53600	0.05	858	0.1	953	0.3	1348	2	2304	30	3436	1.995	756	604.8	295.2	151.2	395.368	1976.84	0.2	15.0254	12.0203	11.2372	3.00508	0.934854	0.0665541	4	3.82027	0.0651455	0.783069	14.3503	0.934854
2007-05-31	8	Rosenka	1-MCP	946	2581	1635	0.633	900	57000	0.05	1023	0.1	1100	0.3	1344	2	1874	30	2307	0.486	946	599.268	259.133	346.732	349.322	953.065	0.366525	16.3312	10.3377	9.36396	5.99356	0.90581	0.0612324	1.72833	1.01775	0.0941896	0.9737	9.61688	0.90581
2007-05-31	8	Rosenka	1-MCP	777	2189	1412	0.645	900	53400	0.05	815	0.1	863	0.3	1011	2	1445	30	1882	0.932	777	501.199	264.088	275.801	357.693	1007.71	0.354957	16.874	10.8837	10.2208	5.99027	0.939093	0.0592628	1.81725	1.66051	0.0609065	0.66289	15.4186	0.939093
2007-05-31	8	Rosenka	1-MCP	706	3012	2306	0.766	600	44200	0.05	798	0.1	888	0.3	1236	2	2101	30	2744	1.075	706	540.517	213.535	165.483	355.67	1517.39	0.234396	15.2067	11.6484	10.729	3.55837	0.921075	0.0657604	3.26629	2.5067	0.0789245	0.919341	11.6703	0.921075
2007-05-31	8	Rosenka	1-MCP	734	1820	1086	0.597	900	33800	0.05	774	0.1	813	0.3	953	2	1358	30	1668	0.466	734	437.98	186.323	296.02	311.986	773.589	0.403297	18.5739	11.0886	10.282	7.48527	0.927256	0.053839	1.47956	1.01539	0.072744	0.80663	12.7468	0.927256
2007-05-31	8	Rosenka	1-MCP	648	2509	1861	0.742	600	40800	0.05	712	0.1	771	0.3	1019	2	1673	30	2280	1.2	648	480.641	215.914	167.359	331.979	1285.39	0.25827	16.2602	12.065	11.2676	4.19512	0.933907	0.0615	2.87191	2.49569	0.0660935	0.797421	14.1301	0.933907
2007-05-31	8	Rosenka	1-MCP	816	2553	1737	0.68	500	40800	0.05	894	0.1	972	0.3	1247	2	1797	30	2288	0.635	816	555.187	241.636	260.813	315.915	988.397	0.319624	16.2519	11.0513	10.0588	5.2006	0.91019	0.0615313	2.12868	1.32743	0.08981	0.992516	10.1346	0.91019
2007-05-31	8	Rosenka	1-MCP	611	3413	2802	0.821	500	61000	0.05	667	0.1	718	0.3	932	2	1603	30	2961	5.307	611	501.618	324.029	109.382	387.543	2164.78	0.179021	14.6163	12	11.5418	2.61632	0.961813	0.0684167	4.58592	7.90249	0.038187	0.458244	25.1869	0.961813
2007-05-31	8	Rosenka	1-MCP	615	3450	2835	0.822	300	52400	0.05	691	0.1	757	0.3	1057	2	1901	30	3074	3.319	615	505.37	276.126	109.63	367.593	2062.11	0.178261	15.1468	12.4507	11.8271	2.69614	0.949912	0.0660204	4.60976	5.7717	0.0500882	0.623633	18.9648	0.949912
2007-06-04	12	Rosenka	Control	621	3499	2878	0.823	270	49200	0.05	696	0.1	765	0.3	1049	2	1792	30	3053	3.801	621	510.785	302.957	110.215	349.375	1968.54	0.177479	14.4458	11.8889	11.294	2.55691	0.949965	0.0692243	4.63446	6.09107	0.0500347	0.594858	18.9861	0.949965
2007-06-04	12	Rosenka	Control	625	3467	2842	0.82	280	45800	0.05	705	0.1	781	0.3	1078	2	1793	30	3086	3.444	625	512.331	301.774	112.669	330.244	1831.93	0.180271	14.1651	11.6154	10.9778	2.54972	0.945109	0.070596	4.5472	5.52721	0.0548909	0.637579	17.2179	0.945109
2007-06-04	12	Rosenka	Control	592	3281	2689	0.82	290	48800	0.05	667	0.1	737	0.3	1026	2	1716	30	2871	3.356	592	485.184	282.377	106.816	314.14	1741.04	0.180433	14.6005	11.9724	11.3268	2.62809	0.946077	0.0684908	4.54223	5.45821	0.0539234	0.645593	17.5448	0.946077
2007-06-04	12	Rosenka	Control	601	3719	3118	0.838	270	51800	0.05	692	0.1	773	0.3	1127	2	1934	30	3289	3.69	601	503.877	288.461	97.123	319.234	1975.42	0.161603	14.5973	12.2326	11.5578	2.36477	0.944836	0.0685057	5.18802	6.08741	0.0551636	0.674792	17.1279	0.944836
2007-06-04	12	Rosenka	Control	582	3506	2924	0.834	290	44200	0.05	673	0.1	753	0.3	1112	2	1953	30	3189	3.069	582	485.387	257.8	96.613	313.899	1890.94	0.166001	14.8653	12.3977	11.6726	2.46764	0.941518	0.0672708	5.02405	5.44115	0.0584815	0.725034	16.0994	0.941518
2007-06-04	12	Rosenka	Control	596	3334	2738	0.821	300	39000	0.05	702	0.1	794	0.3	1183	2	2044	30	3066	2.073	596	489.457	230.606	106.543	301.845	1688.51	0.178764	14.4441	11.8586	11.001	2.58549	0.927684	0.0692325	4.59396	4.08005	0.0723156	0.85756	12.8283	0.927684
2007-06-04	12	Rosenka	Control	724	3331	2607	0.783	400	27800	0.05	814	0.1	902	0.3	1184	2	1700	30	3138	2.498	724	566.637	354.501	157.363	300.564	1382.84	0.217352	13.2019	10.3371	9.63129	2.86481	0.931722	0.0757467	3.60083	3.72198	0.0682777	0.705792	13.6461	0.931722
2007-06-04	12	Rosenka	Control	586	3560	2974	0.835	290	59400	0.05	650	0.1	708	0.3	968	2	1693	30	2993	5.18	586	489.54	307.321	96.46	354.661	2154.59	0.164607	14.9995	12.5246	12.0108	2.47492	0.958978	0.0666688	5.07509	7.90963	0.0410222	0.513786	23.377	0.958978
2007-06-04	12	Rosenka	AOA	560	3127	2567	0.821	290	59000	0.05	621	0.1	675	0.3	923	2	1642	30	2612	3.849	560	459.712	265.942	100.288	342.568	1912.88	0.179085	15.3789	12.6261	12.0604	2.75283	0.955201	0.0650241	4.58393	6.35528	0.0447994	0.565641	21.3217	0.955201
2007-06-04	12	Rosenka	AOA	603	3323	2720	0.819	290	54000	0.05	675	0.1	738	0.3	1027	2	1817	30	2853	3.279	603	493.578	273.283	109.422	353.304	1946.98	0.181463	15.3394	12.563	11.9394	2.77643	0.950368	0.0651916	4.51078	5.6308	0.0496324	0.623529	19.1481	0.950368
2007-06-04	12	Rosenka	AOA	650	3287	2637	0.802	280	35000	0.05	753	0.1	848	0.3	1226	2	2043	30	3016	1.757	650	521.463	245.999	128.537	315.277	1594.33	0.197749	14.5092	11.6364	10.7626	2.87282	0.924915	0.0689219	4.05692	3.4443	0.0750853	0.87372	12.3182	0.924915
2007-06-04	12	Rosenka	AOA	540	3216	2676	0.832	280	57600	0.05	593	0.1	644	0.3	864	2	1540	30	2694	5.333	540	449.328	281.418	90.672	346.704	2064.82	0.16791	14.9778	12.4615	11.9772	2.51627	0.961136	0.0667654	4.95556	8.18242	0.038864	0.484305	24.7308	0.961136
2007-06-04	12	Rosenka	AOA	627	3419	2792	0.817	290	50000	0.05	718	0.1	803	0.3	1130	2	1814	30	2939	2.901	627	512.016	294.336	114.984	302.069	1647.17	0.183387	13.9924	11.4318	10.7112	2.56062	0.936963	0.0714672	4.45295	4.7302	0.0630372	0.72063	14.8636	0.936963
2007-06-04	12	Rosenka	AOA	511	3006	2495	0.83	400	55000	0.05	567	0.1	622	0.3	862	2	1523	30	2536	4.281	511	424.133	252.1	86.867	305.714	1798.39	0.169993	15.2393	12.6486	12.0859	2.59069	0.955511	0.0656197	4.88258	6.88124	0.044489	0.562725	21.4775	0.955511
2007-06-04	12	Rosenka	AOA	569	3638	3069	0.844	290	55400	0.05	632	0.1	689	0.3	954	2	1740	30	3175	5.608	569	480.006	296.856	88.994	364.991	2333.64	0.156405	15.2054	12.8333	12.3315	2.37204	0.960899	0.0657662	5.39367	8.71728	0.0391007	0.501792	24.575	0.960899
2007-06-04	12	Rosenka	AOA	674	3062	2388	0.78	500	114000	0.05	740	0.1	802	0.3	1011	2	1408	30	2394	3.39	674	525.641	364.074	148.359	286.217	1300.29	0.220118	13.5016	10.5312	9.96676	2.97035	0.946399	0.0740653	3.54303	4.63327	0.0536013	0.564489	17.6563	0.946399
2007-06-04	12	Rosenka	AOA	582	3341	2759	0.826	250	52400	0.05	659	0.1	730	0.3	1030	2	1742	30	2874	3.493	582	480.616	278.545	101.384	311.113	1785.96	0.174199	14.6587	12.1081	11.4586	2.55062	0.946357	0.0682188	4.74055	5.70529	0.0536426	0.649511	17.6419	0.946357
2007-06-04	12	Rosenka	AOA	561	3291	2730	0.83	280	47200	0.05	647	0.1	726	0.3	1052	2	1865	30	2844	2.931	561	465.369	243.083	95.631	308.982	1812.59	0.170465	14.341	11.903	11.1836	2.43797	0.93956	0.0697301	4.86631	5.27502	0.0604396	0.719414	15.5455	0.93956
2007-06-04	12	Rosenka	AOA	630	3695	3065	0.829	290	54200	0.05	714	0.1	790	0.3	1114	2	1914	30	3319	3.712	630	522.585	303.662	107.415	346.59	2032.78	0.170501	14.5959	12.1	11.4684	2.4959	0.947798	0.0685124	4.86508	6.05181	0.0522023	0.631648	18.1562	0.947798
2007-06-04	12	Rosenka	1-MCP	570	3378	2808	0.831	290	48600	0.05	652	0.1	720	0.3	1040	2	1868	30	3009	3.289	570	473.819	254.796	96.181	327.137	1938.71	0.168739	15.0822	12.5333	11.8638	2.5489	0.946581	0.0663032	4.92632	5.78789	0.0534188	0.669516	17.72	0.946581
2007-06-04	12	Rosenka	1-MCP	651	3385	2734	0.808	250	44800	0.05	757	0.1	850	0.3	1261	2	2187	30	2999	1.665	651	525.8	230.398	125.2	330.996	1721.08	0.192319	15.1749	12.2613	11.3688	2.91358	0.927213	0.0658984	4.19969	3.52547	0.0727871	0.892465	12.7387	0.927213
2007-06-04	12	Rosenka	1-MCP	640	2887	2247	0.778	290	36400	0.05	777	0.1	923	0.3	1331	2	1877	30	2567	0.999	640	498.123	223.9	141.877	222.93	1005.62	0.221683	12.5537	9.76678	8.5367	2.78692	0.874054	0.0796577	3.51094	1.94091	0.125946	1.23008	6.93993	0.874054
2007-06-04	12	Rosenka	1-MCP	698	3295	2597	0.788	300	40400	0.05	872	0.1	1071	0.3	1549	2	2045	30	3005	1.077	698	550.138	264.795	147.862	217.696	1027.66	0.211836	11.5812	9.12601	7.81526	2.45522	0.856373	0.0863467	3.72063	1.91553	0.143627	1.31074	5.96247	0.856373
2007-06-04	12	Rosenka	1-MCP	769	3409	2640	0.774	290	48200	0.05	856	0.1	950	0.3	1218	2	1760	30	3032	2.441	769	595.529	371.98	173.471	328.602	1456.7	0.225579	12.82	9.92265	9.24235	2.89731	0.931439	0.0780033	3.43303	3.63807	0.0685606	0.680303	13.5856	0.931439
2007-06-04	12	Rosenka	1-MCP	600	3479	2879	0.828	270	56800	0.05	681	0.1	758	0.3	1066	2	1781	30	2964	3.617	600	496.522	292.843	103.478	314.588	1824.09	0.172463	14.2482	11.7975	11.15	2.45068	0.94512	0.0701845	4.79833	5.79967	0.0548802	0.647447	17.2215	0.94512
2007-06-08	16	Rosenka	Control	593	3330	2737	0.822	280	47200	0.05	658	0.1	717	0.3	979	2	1693	30	2810	4.022	593	487.4	291.514	105.6	347.241	1949.93	0.178078	15.1479	12.4516	11.8875	2.69633	0.954695	0.0660155	4.61551	6.42072	0.0453051	0.564121	21.0726	0.954695
2007-06-08	16	Rosenka	Control	721	3701	2980	0.805	290	36000	0.05	869	0.1	1019	0.3	1508	2	2295	30	3461	1.486	721	580.54	273.906	140.46	290.27	1490	0.194812	13.1227	10.5638	9.50738	2.55892	0.9	0.0762039	4.13315	2.83466	0.1	1.05638	9	0.9
2007-06-08	16	Rosenka	Control	672	3626	2954	0.815	280	40200	0.05	782	0.1	882	0.3	1293	2	2102	30	3332	2.197	672	547.459	282.44	124.541	315.164	1700.57	0.185328	14.5136	11.8286	10.9877	2.68501	0.92891	0.068901	4.39583	3.95759	0.07109	0.840894	13.0667	0.92891
2007-06-08	16	Rosenka	Control	652	3437	2785	0.81	280	43200	0.05	762	0.1	865	0.3	1253	2	1975	30	3069	2.105	652	528.315	277.342	123.685	290.749	1532.68	0.1897	13.9338	11.2864	10.4232	2.64742	0.923519	0.0717679	4.27147	3.70168	0.0764811	0.863196	12.0751	0.923519
2007-06-08	16	Rosenka	Control	897	3633	2736	0.753	290	33200	0.05	1095	0.1	1306	0.3	1881	2	2588	30	3350	0.61	897	675.528	258.014	221.472	290.223	1175.45	0.246903	12.7802	9.62347	8.18488	3.1567	0.850512	0.0782462	3.05017	1.35788	0.149488	1.4386	5.68949	0.850512
2007-06-08	16	Rosenka	Control	685	3610	2925	0.81	290	38800	0.05	800	0.1	907	0.3	1317	2	2094	30	3309	2.075	685	555.021	287.662	129.979	309.345	1630.27	0.189751	14.0585	11.3874	10.5231	2.67112	0.924103	0.0711313	4.27007	3.69819	0.0758974	0.864274	12.1757	0.924103
2007-06-08	16	Rosenka	AOA	624	3058	2434	0.796	280	40000	0.05	702	0.1	772	0.3	1102	2	2097	30	2598	1.56	624	496.67	196.097	127.33	382.633	1875.15	0.204055	16.2298	12.9189	12.1334	3.31088	0.939195	0.0616151	3.90064	3.71225	0.0608053	0.785538	15.4459	0.939195
2007-06-08	16	Rosenka	AOA	620	3394	2774	0.817	250	44000	0.05	702	0.1	776	0.3	1093	2	1895	30	2906	2.897	620	506.741	273.83	113.259	341.488	1869.37	0.182675	14.8448	12.1282	11.4462	2.7166	0.943764	0.0673636	4.47419	5.05808	0.0562365	0.682048	16.7821	0.943764
2007-06-08	16	Rosenka	AOA	561	3203	2642	0.825	290	49400	0.05	621	0.1	677	0.3	919	2	1550	30	2727	4.484	561	462.742	289.52	98.258	319.589	1824.68	0.175148	14.9634	12.3448	11.8028	2.6186	0.956094	0.0668296	4.70945	6.85353	0.0439061	0.542014	21.7759	0.956094
2007-06-08	16	Rosenka	AOA	594	3108	2514	0.809	280	41400	0.05	666	0.1	732	0.3	1026	2	1846	30	2651	2.5	594	480.475	241.193	113.525	348.122	1821.49	0.19112	15.478	12.5217	11.8344	2.95631	0.945107	0.0646076	4.23232	4.70793	0.0548926	0.687351	17.2174	0.945107
2007-06-08	16	Rosenka	AOA	618	3318	2700	0.814	290	48600	0.05	687	0.1	749	0.3	1011	2	1705	30	2881	3.648	618	502.893	300.432	115.107	347.739	1866.98	0.186257	14.742	12	11.4178	2.74201	0.951481	0.0678333	4.36893	5.81181	0.0485185	0.582222	19.6107	0.951481
2007-06-08	16	Rosenka	AOA	584	3194	2610	0.817	280	39800	0.05	667	0.1	742	0.3	1077	2	1902	30	2802	2.393	584	477.22	236.233	106.78	318.953	1744.41	0.182843	15.2766	12.481	11.7255	2.79562	0.939464	0.0654594	4.46918	4.54008	0.0605364	0.755556	15.519	0.939464
2007-06-08	16	Rosenka	AOA	708	3818	3110	0.815	290	50000	0.05	825	0.1	931	0.3	1363	2	2244	30	3414	2.15	708	576.71	291.878	131.29	338.102	1823.27	0.185437	14.4158	11.7489	10.9064	2.66692	0.928296	0.0693683	4.39266	3.94485	0.0717042	0.842444	12.9462	0.928296
2007-06-08	16	Rosenka	1-MCP	602	3280	2678	0.816	280	53400	0.05	670	0.1	729	0.3	1024	2	1958	30	2737	2.845	602	491.511	242.635	110.489	394.839	2151.28	0.183537	16.2884	13.2913	12.661	2.99707	0.952577	0.0613934	4.4485	5.48583	0.0474235	0.630321	20.0866	0.952577
2007-06-08	16	Rosenka	1-MCP	593	3492	2899	0.83	290	50400	0.05	664	0.1	730	0.3	1024	2	1827	30	3082	3.92	593	492.299	282.745	100.701	352.376	2075.04	0.169817	15.1614	12.5839	11.9893	2.57743	0.952742	0.0659571	4.8887	6.50067	0.0472577	0.594688	20.1606	0.952742
2007-06-08	16	Rosenka	1-MCP	632	3121	2489	0.798	280	38000	0.05	709	0.1	780	0.3	1088	2	1932	30	2795	2.047	632	504.021	240.772	127.979	359.225	1773.96	0.202499	15.444	12.3243	11.5915	3.11969	0.940538	0.06475	3.93829	4.03355	0.0594616	0.732824	15.8176	0.940538
2007-06-08	16	Rosenka	1-MCP	559	3260	2701	0.829	290	51400	0.05	633	0.1	704	0.3	1001	2	1697	30	2835	3.539	559	463.147	268.011	95.853	298.112	1738.54	0.171472	14.7082	12.1931	11.5385	2.5151	0.946316	0.0679893	4.83184	5.7909	0.0536838	0.654572	17.6276	0.946316
2007-06-08	16	Rosenka	1-MCP	638	3350	2712	0.81	300	45800	0.05	742	0.1	835	0.3	1214	2	1959	30	3007	2.078	638	516.494	264.913	121.506	296.132	1554.93	0.190448	14.4388	11.6954	10.8459	2.74337	0.92736	0.0692578	4.25078	3.75846	0.0726401	0.849558	12.7665	0.92736
2007-06-08	16	Rosenka	1-MCP	598	3050	2452	0.804	290	37600	0.05	735	0.1	874	0.3	1297	2	1842	30	2770	1.424	598	480.753	236.847	117.247	213.897	1090.95	0.196066	12.6	10.1304	8.99014	2.46961	0.887439	0.0793648	4.10033	2.56565	0.112561	1.14029	7.88406	0.887439
2007-06-08	16	Rosenka	1-MCP	607	3410	2803	0.822	270	49800	0.05	694	0.1	771	0.3	1107	2	1973	30	2906	2.727	607	498.95	255.794	108.05	340.783	1914.45	0.178006	14.8359	12.1951	11.4816	2.64079	0.941491	0.067404	4.61779	5.00859	0.0585087	0.713521	16.0915	0.941491
2007-06-08	16	Rosenka	1-MCP	739	3485	2746	0.788	290	39000	0.05	862	0.1	979	0.3	1408	2	2129	30	3114	1.484	739	582.294	287.542	156.706	302.462	1426.36	0.212052	14.1497	11.15	10.1755	2.99975	0.9126	0.0706726	3.71583	2.74206	0.0873999	0.974508	10.4417	0.9126
2007-06-08	16	Rosenka	1-MCP	652	3424	2772	0.81	280	45800	0.05	744	0.1	829	0.3	1144	2	1784	30	3027	2.868	652	527.846	312.29	124.154	303.619	1594.46	0.190421	13.7267	11.1186	10.4087	2.60808	0.936147	0.0728506	4.25153	4.54091	0.0638528	0.709957	14.661	0.936147

## Sheet: Don Mario2007
Date	Time	ID	treatment	Fo	Fm	Fv	Fv/Fm	Tfm ms	Area	T1 ms	F1	T2 ms	F2	T3 ms	F3	T4 ms	F4	T5 ms	F5	P.I.	ABS/CS	TRo/CS	ETo/CS	DIo/CS	RC/CSo	RC/CSm	Fo/Fm	ABS/RC	TRo/RC	ETo/RC	DIo/RC	ETo/TRo	RC/ABS	Fv/Fo	PI_abs	Vj	Mo	Yo/1-Yo	Yo=Eto/Tro=(1-Vj)
2007-05-23	0	Don Mario	Control	573	3716	3143	0.846	290	82800	0.05	635	0.1	690	0.3	929	2	1600	30	2827	6.894	573	484.645	326.283	88.355	349.529	2266.76	0.154198	14.3865	12.1709	11.7179	2.21551	0.962774	0.0695098	5.48517	9.86096	0.0372256	0.45307	25.8632	0.962774
2007-05-23	0	Don Mario	Control	718	3213	2495	0.777	600	61800	0.05	806	0.1	888	0.3	1185	2	1838	30	2562	1.986	718	557.551	307.267	160.449	334.292	1495.93	0.223467	14.1419	10.9882	10.2395	3.15364	0.931864	0.070712	3.47493	3.36057	0.0681363	0.748697	13.6765	0.931864
2007-05-23	0	Don Mario	Control	629	3764	3135	0.833	500	78400	0.05	705	0.1	776	0.3	1055	2	1722	30	2945	4.975	629	523.888	341.238	105.112	336.039	2010.89	0.167109	13.9158	11.5918	11.0483	2.32393	0.95311	0.0718609	4.9841	7.28019	0.04689	0.543541	20.3265	0.95311
2007-05-23	0	Don Mario	Control	581	3581	3000	0.838	400	77400	0.05	649	0.1	714	0.3	977	2	1651	30	2709	5.271	581	486.736	313.133	94.264	328.792	2026.52	0.162245	14.2121	11.9098	11.3818	2.30237	0.955667	0.0703624	5.16351	7.8318	0.0443333	0.528	21.5564	0.955667
2007-05-23	0	Don Mario	Control	545	3564	3019	0.847	600	77000	0.05	603	0.1	654	0.3	872	2	1519	30	2727	7.336	545	461.66	312.717	83.34	343.774	2248.09	0.152918	14.1677	12	11.5667	2.16765	0.963895	0.0705833	5.53945	10.4384	0.0361047	0.433256	26.6972	0.963895
2007-05-23	0	Don Mario	Control	748	3319	2571	0.775	700	86200	0.05	822	0.1	895	0.3	1139	2	1679	30	2461	2.792	748	579.424	369.605	168.576	344.913	1530.43	0.225369	13.7283	10.6395	10.0311	3.08887	0.942824	0.0728421	3.43717	4.12855	0.0571762	0.608324	16.4898	0.942824
2007-05-23	0	Don Mario	Control	652	3653	3001	0.822	250	56600	0.05	778	0.1	899	0.3	1330	2	2079	30	3013	2.195	652	535.629	280.933	116.371	281.837	1579.07	0.178483	13.3574	10.9798	10.0761	2.37761	0.917694	0.074865	4.60276	3.84206	0.0823059	0.903699	11.1498	0.917694
2007-05-23	0	Don Mario	Control	750	2983	2233	0.749	300	48200	0.05	872	0.1	998	0.3	1403	2	2073	30	2555	0.776	750	561.431	228.797	188.569	284.37	1131.03	0.251425	14.0618	10.5323	9.36253	3.5295	0.888939	0.0711149	2.97733	1.69471	0.111061	1.16973	8.00403	0.888939
2007-05-23	0	Don Mario	Control	594	3283	2689	0.819	500	65000	0.05	663	0.1	726	0.3	988	2	1691	30	2565	3.746	594	486.526	288.044	107.474	338.654	1871.72	0.180932	14.578	11.9394	11.3533	2.63862	0.950911	0.0685964	4.52694	6.01538	0.0490889	0.586091	19.3712	0.950911
2007-05-23	0	Don Mario	Control	738	3285	2547	0.775	600	55600	0.05	830	0.1	920	0.3	1246	2	1935	30	2786	1.778	738	572.203	303.288	165.797	337.07	1500.37	0.224658	14.4062	11.1648	10.367	3.2414	0.928543	0.0694144	3.45122	3.11302	0.0714566	0.797801	12.9945	0.928543
2007-05-23	0	Don Mario	Control	650	3536	2886	0.816	270	49400	0.05	769	0.1	882	0.3	1330	2	2173	30	2898	1.816	650	530.515	250.551	119.485	297.049	1615.95	0.183824	14.3678	11.7241	10.7817	2.64368	0.919612	0.0696	4.44	3.53513	0.0803881	0.942481	11.4397	0.919612
2007-05-23	0	Don Mario	Control	600	3445	2845	0.826	300	57800	0.05	688	0.1	773	0.3	1107	2	1914	30	2783	2.956	600	495.501	266.647	104.499	321.049	1843.36	0.174165	14.1919	11.7225	11.0097	2.4694	0.939192	0.0704625	4.74167	5.16035	0.0608084	0.71283	15.4451	0.939192
2007-05-31	8	Don Mario	Control	988	3469	2481	0.715	700	59400	0.05	1104	0.1	1236	0.3	1615	2	2322	30	3017	0.821	988	706.609	326.675	281.391	375.844	1319.64	0.284808	14.1439	10.1129	9.10202	4.03102	0.90004	0.0707018	2.51113	1.59859	0.0999597	1.01088	9.00403	0.90004
2007-05-31	8	Don Mario	Control	747	3536	2789	0.789	600	76400	0.05	835	0.1	919	0.3	1227	2	1940	30	2901	2.448	747	589.192	337.164	157.808	366.097	1732.96	0.211256	14.148	11.1628	10.4744	2.98523	0.938329	0.0706813	3.7336	4.0152	0.0616708	0.688419	15.2151	0.938329
2007-05-31	8	Don Mario	Control	916	3236	2320	0.717	600	68000	0.05	1012	0.1	1118	0.3	1433	2	2102	30	2745	0.996	916	656.712	320.996	259.288	376.625	1330.52	0.283066	14.2784	10.2376	9.34624	4.04079	0.912931	0.0700358	2.53275	1.85989	0.087069	0.891379	10.4851	0.912931
2007-05-31	8	Don Mario	Control	672	2677	2005	0.749	800	65800	0.05	711	0.1	754	0.3	899	2	1395	30	2161	3.155	672	503.31	321.817	168.69	400.763	1596.49	0.251027	14.7839	11.0732	10.6203	3.71077	0.959102	0.067641	2.98363	4.73282	0.0408978	0.452868	23.4512	0.959102
2007-05-31	8	Don Mario	Control	681	3097	2416	0.78	900	95800	0.05	747	0.1	820	0.3	1058	2	1699	30	2547	2.566	681	531.255	307.407	149.745	358.632	1630.96	0.21989	13.9089	10.8489	10.2247	3.05995	0.942467	0.0718966	3.54772	4.17836	0.0575331	0.624172	16.3813	0.942467
2007-05-31	8	Don Mario	Control	910	3519	2609	0.741	600	57000	0.05	1026	0.1	1144	0.3	1540	2	2362	30	3125	0.976	910	674.677	299.196	235.323	388.743	1503.28	0.258596	14.5334	10.7692	9.80334	3.76414	0.91031	0.0688071	2.86703	2.00223	0.0896895	0.965887	10.1496	0.91031
2007-05-31	8	Don Mario	Control	817	2839	2022	0.712	900	87000	0.05	862	0.1	912	0.3	1056	2	1440	30	2190	2.579	817	581.886	402.601	235.114	379.2	1317.68	0.287777	14.1336	10.0632	9.59036	4.07049	0.953017	0.0707531	2.47491	3.55192	0.0469832	0.472799	20.2842	0.953017
2007-05-31	8	Don Mario	Control	623	3113	2490	0.8	700	78400	0.05	682	0.1	740	0.3	971	2	1708	30	2566	3.227	623	498.32	281.181	124.68	388.417	1940.84	0.200128	14.8718	11.8974	11.3384	2.97436	0.953012	0.0672414	3.99679	5.45079	0.046988	0.559036	20.2821	0.953012
2007-05-31	8	Don Mario	Control	718	3140	2422	0.771	600	63200	0.05	800	0.1	876	0.3	1165	2	1912	30	2680	1.787	718	553.82	280.797	164.18	369.833	1617.38	0.228662	14.6776	11.3165	10.5782	3.36118	0.934765	0.0681309	3.37326	3.29316	0.0652353	0.738233	14.3291	0.934765
2007-05-31	8	Don Mario	AOA	708	3231	2523	0.781	300	49400	0.05	820	0.1	929	0.3	1310	2	2114	30	2849	1.291	708	552.858	244.765	155.142	322.807	1473.15	0.219127	13.9513	10.8959	9.94151	3.05532	0.912406	0.0716782	3.56356	2.66063	0.0875941	0.954419	10.4163	0.912406
2007-05-31	8	Don Mario	AOA	798	3144	2346	0.746	600	57400	0.05	892	0.1	988	0.3	1318	2	2044	30	2728	1.16	798	595.454	279.198	202.546	356.7	1405.34	0.253817	14.6748	10.9474	10.0608	3.72739	0.919011	0.0681442	2.93985	2.27326	0.0809889	0.886616	11.3474	0.919011
2007-05-31	8	Don Mario	AOA	750	3586	2836	0.791	500	64000	0.05	864	0.1	978	0.3	1373	2	2210	30	3127	1.651	750	593.14	287.786	156.86	347.506	1661.54	0.209147	13.8177	10.9298	10.0511	2.88791	0.919605	0.0723708	3.78133	3.13026	0.0803949	0.878702	11.4386	0.919605
2007-05-31	8	Don Mario	AOA	918	2788	1870	0.671	800	82200	0.05	984	0.1	1056	0.3	1277	2	1803	30	2350	0.937	918	615.732	324.329	302.268	379.473	1152.47	0.329268	15.5079	10.4058	9.63788	5.1021	0.926203	0.0644833	2.03704	1.6486	0.0737968	0.767914	12.5507	0.926203
2007-05-31	8	Don Mario	AOA	591	1144	553	0.483	700	28800	0.05	605	0.1	622	0.3	669	2	820	30	976	0.47	591	285.684	167.381	305.316	209.685	405.888	0.516608	20.8375	10.0645	9.50032	10.773	0.943942	0.0479904	0.935702	0.756137	0.0560579	0.564195	16.8387	0.943942
2007-05-31	8	Don Mario	AOA	743	2561	1818	0.71	700	52600	0.05	802	0.1	858	0.3	1067	2	1662	30	2197	1.205	743	527.44	260.819	215.56	374.01	1289.15	0.290121	15.8726	11.2696	10.5567	4.60306	0.936744	0.0630015	2.44684	2.28283	0.0632563	0.712871	14.8087	0.936744
2007-05-31	8	Don Mario	AOA	714	1188	474	0.399	900	28000	0.05	731	0.1	744	0.3	795	2	949	30	1073	0.195	714	284.879	143.641	429.121	206.625	343.796	0.60101	27.0677	10.8	10.1165	16.2677	0.936709	0.0369444	0.663866	0.362987	0.0632911	0.683544	14.8	0.936709
2007-05-31	8	Don Mario	1-MCP	708	2454	1746	0.711	700	71400	0.05	747	0.1	785	0.3	937	2	1460	30	1968	1.904	708	503.736	286.778	204.264	413.547	1433.4	0.288509	16.7315	11.8961	11.3715	4.83541	0.955899	0.0597675	2.4661	3.19478	0.0441008	0.524628	21.6753	0.955899
2007-05-31	8	Don Mario	1-MCP	740	2859	2119	0.741	300	54200	0.05	803	0.1	863	0.3	1090	2	1767	30	2399	1.655	740	548.464	282.644	191.536	402.338	1554.44	0.258832	15.3605	11.3821	10.7214	3.97836	0.941954	0.0651021	2.86351	3.02517	0.0580462	0.660689	16.2276	0.941954
2007-05-31	8	Don Mario	1-MCP	994	1921	927	0.483	900	38800	0.05	1040	0.1	1089	0.3	1236	2	1546	30	1727	0.174	994	479.666	194.04	514.334	273.528	528.62	0.517439	21.0962	10.1895	9.14524	10.9067	0.897519	0.0474019	0.932596	0.387158	0.102481	1.04423	8.75789	0.897519
2007-05-31	8	Don Mario	1-MCP	804	2105	1301	0.618	600	40000	0.05	844	0.1	886	0.3	1009	2	1330	30	1788	0.945	804	496.914	296.01	307.086	318.752	834.544	0.381948	16.1812	10	9.36972	6.18123	0.936972	0.0618	1.61816	1.48662	0.0630284	0.630284	14.8659	0.936972
2007-05-31	8	Don Mario	1-MCP	839	3501	2662	0.76	300	49600	0.05	954	0.1	1071	0.3	1478	2	2380	30	3085	1.058	839	637.937	268.643	201.063	384.609	1604.91	0.239646	14.4964	11.0172	10.0571	3.47913	0.912847	0.0689828	3.17282	2.29248	0.0871525	0.96018	10.4741	0.912847
2007-05-31	8	Don Mario	1-MCP	657	3436	2779	0.809	400	71200	0.05	775	0.1	888	0.3	1303	2	2144	30	2928	1.711	657	531.375	247.044	125.625	305.787	1599.22	0.191211	13.8271	11.1861	10.2563	2.64098	0.916877	0.0723216	4.22983	3.37426	0.0831234	0.929831	11.0303	0.916877
2007-05-31	8	Don Mario	1-MCP	638	2689	2051	0.763	700	70400	0.05	696	0.1	748	0.3	957	2	1570	30	2267	2.15	638	486.626	265.497	151.374	355.435	1498.07	0.237263	15.2031	11.6	10.9779	3.60315	0.946368	0.0657759	3.21473	3.73116	0.0536324	0.622136	17.6455	0.946368
2007-05-31	8	Don Mario	1-MCP	679	2482	1803	0.726	700	61400	0.05	740	0.1	797	0.3	1028	2	1655	30	2110	1.143	679	493.246	226.242	185.754	344.848	1260.55	0.27357	16.2955	11.8305	11.0562	4.46496	0.934554	0.0613668	2.65538	2.3269	0.0654465	0.774265	14.2797	0.934554
2007-05-31	8	Don Mario	1-MCP	694	3693	2999	0.812	700	108000	0.05	769	0.1	841	0.3	1116	2	1922	30	2906	3.682	694	563.581	332.812	130.419	409.999	2181.74	0.187923	14.1416	11.483	10.9201	2.65862	0.950984	0.0707133	4.32133	5.92857	0.0490163	0.562854	19.4014	0.950984
2007-05-31	8	Don Mario	1-MCP	858	2341	1483	0.633	700	49200	0.05	901	0.1	947	0.3	1104	2	1612	30	2034	0.811	858	543.534	267.186	314.466	416.489	1136.36	0.36651	17.4663	11.0562	10.3927	6.41014	0.939987	0.057253	1.72844	1.54998	0.0600135	0.66352	15.6629	0.939987
2007-06-04	12	Don Mario	1-MCP	614	3828	3214	0.84	500	71800	0.05	700	0.1	781	0.3	1123	2	2013	30	3253	3.918	614	515.516	291.121	98.484	354.227	2208.44	0.160397	14.5138	12.1916	11.5581	2.32221	0.94804	0.0688998	5.23453	6.58039	0.0519602	0.633479	18.2455	0.94804
2007-06-04	12	Don Mario	1-MCP	712	3921	3209	0.818	300	59400	0.05	817	0.1	915	0.3	1293	2	2121	30	3413	2.857	712	582.711	326.855	129.289	353.287	1945.56	0.181586	13.9954	11.4483	10.7241	2.54717	0.93674	0.0714518	4.50702	4.76865	0.0632596	0.724213	14.8079	0.93674
2007-06-04	12	Don Mario	1-MCP	644	3862	3218	0.833	290	54000	0.05	770	0.1	889	0.3	1368	2	2282	30	3525	2.272	644	536.611	263.47	107.389	303.511	1820.13	0.166753	14.1902	11.8204	10.9205	2.36976	0.923866	0.0704713	4.99689	4.27308	0.0761342	0.899938	12.1347	0.923866
2007-06-04	12	Don Mario	1-MCP	735	4095	3360	0.821	130	34200	0.05	875	0.1	1008	0.3	1498	2	2482	30	3756	1.982	735	603.077	289.513	131.923	345.208	1923.3	0.179487	13.6169	11.1795	10.2712	2.43743	0.91875	0.0734381	4.57143	3.79618	0.08125	0.908333	11.3077	0.91875
2007-06-04	12	Don Mario	1-MCP	592	3441	2849	0.828	400	62000	0.05	675	0.1	751	0.3	1075	2	1860	30	2950	3.261	592	490.151	272	101.849	321.693	1869.84	0.172043	14.6751	12.1509	11.4728	2.52411	0.944191	0.0681429	4.8125	5.54812	0.0558091	0.678133	16.9182	0.944191
2007-06-04	12	Don Mario	1-MCP	767	3739	2972	0.795	600	41000	0.05	915	0.1	1058	0.3	1567	2	2476	30	3492	1.216	767	609.661	259.086	157.339	325.597	1587.23	0.205135	13.8322	10.9966	9.91985	2.83559	0.902086	0.0722953	3.87484	2.58088	0.0979139	1.07672	9.21306	0.902086
2007-06-04	12	Don Mario	1-MCP	624	4014	3390	0.845	500	71800	0.05	712	0.1	800	0.3	1161	2	2060	30	3423	4.174	624	526.996	303.761	97.004	352.312	2266.31	0.155456	14.4432	12.2045	11.5709	2.2387	0.948083	0.0692365	5.43269	6.86884	0.0519174	0.633628	18.2614	0.948083
2007-06-04	12	Don Mario	1-MCP	628	3693	3065	0.83	300	64400	0.05	701	0.1	766	0.3	1069	2	1923	30	3219	4.064	628	521.208	300.991	106.792	382.633	2250.1	0.170051	15.4007	12.7826	12.2071	2.61812	0.954976	0.064932	4.88057	6.72161	0.0450245	0.57553	21.2101	0.954976
2007-06-04	12	Don Mario	1-MCP	573	3356	2783	0.829	400	58400	0.05	659	0.1	737	0.3	1065	2	1845	30	2910	3.092	573	475.167	257.987	97.833	307.12	1798.77	0.170739	14.4753	12	11.2928	2.47527	0.941071	0.0690833	4.85689	5.35826	0.0589292	0.707151	15.9695	0.941071
2007-06-04	12	Don Mario	AOA	565	3592	3027	0.843	400	60400	0.05	650	0.1	730	0.3	1041	2	1810	30	3048	4.226	565	476.129	280.298	88.871	311.334	1979.32	0.157294	13.6885	11.5394	10.9104	2.14909	0.945491	0.0730541	5.35752	6.78882	0.0545094	0.629006	17.3455	0.945491
2007-06-04	12	Don Mario	AOA	629	3704	3075	0.83	400	68600	0.05	722	0.1	809	0.3	1147	2	1978	30	3137	3.381	629	522.185	293.103	106.815	339.975	2002.02	0.169816	13.8688	11.5111	10.8373	2.3577	0.941463	0.0721042	4.88871	5.66933	0.0585366	0.673821	16.0833	0.941463
2007-06-04	12	Don Mario	AOA	746	3740	2994	0.801	400	64600	0.05	885	0.1	1019	0.3	1488	2	2329	30	3255	1.527	746	597.199	281.445	148.801	318.52	1596.87	0.199465	13.5728	10.8718	9.88048	2.70098	0.908818	0.0736769	4.0134	2.9472	0.0911824	0.991316	9.96703	0.908818
2007-06-04	12	Don Mario	AOA	749	3814	3065	0.804	400	56000	0.05	885	0.1	1016	0.3	1483	2	2344	30	3403	1.646	749	601.91	288.681	147.09	326.991	1665.08	0.196382	13.6769	10.9963	10.0383	2.68068	0.912887	0.0731158	4.09212	3.13542	0.0871126	0.957912	10.4794	0.912887
2007-06-04	12	Don Mario	AOA	689	3914	3225	0.824	300	65200	0.05	795	0.1	893	0.3	1275	2	2117	30	3428	2.957	689	567.712	316.334	121.288	345.859	1964.72	0.176035	13.9444	11.4902	10.7634	2.45422	0.936744	0.0717133	4.6807	4.97085	0.0632558	0.726822	14.8088	0.936744
2007-06-04	12	Don Mario	AOA	688	3801	3113	0.819	400	62400	0.05	789	0.1	884	0.3	1250	2	2053	30	3318	2.881	688	563.469	316.397	124.531	342.142	1890.23	0.181005	14.0041	11.4694	10.7473	2.53475	0.937038	0.0714075	4.52471	4.80856	0.0629618	0.722133	14.8827	0.937038
2007-06-04	12	Don Mario	AOA	605	3504	2899	0.827	700	80200	0.05	677	0.1	745	0.3	1016	2	1705	30	2920	4.338	605	500.541	310.615	104.459	334.912	1939.72	0.17266	14.1993	11.7429	11.1758	2.45649	0.951707	0.0704258	4.79174	6.65041	0.0482925	0.567092	19.7071	0.951707
2007-06-04	12	Don Mario	AOA	669	3727	3058	0.82	290	55600	0.05	768	0.1	864	0.3	1217	2	1992	30	3250	2.969	669	548.914	311.434	120.086	331.302	1845.68	0.179501	13.7086	11.241	10.5242	2.46754	0.936233	0.0729471	4.571	4.8956	0.0637672	0.716808	14.6821	0.936233
2007-06-04	12	Don Mario	Control	595	3714	3119	0.84	400	76000	0.05	667	0.1	732	0.3	1011	2	1762	30	3127	5.164	595	499.678	312.719	95.322	350.435	2187.42	0.160205	14.4595	12.146	11.6125	2.31352	0.956076	0.0691587	5.24202	7.891	0.0439243	0.533504	21.7664	0.956076
2007-06-04	12	Don Mario	Control	571	3795	3224	0.85	290	66200	0.05	642	0.1	709	0.3	991	2	1793	30	3220	5.716	571	485.087	301.223	85.913	352.843	2345.08	0.150461	14.3223	12.1739	11.6528	2.14834	0.957196	0.0698214	5.64623	8.81586	0.042804	0.521092	22.3623	0.957196
2007-06-04	12	Don Mario	Control	758	4095	3337	0.815	30	13000	0.05	998	0.1	1223	0.3	2010	2	2880	30	4095	0.87	758	617.691	224.901	140.309	261.729	1413.96	0.185104	13.2146	10.7699	9.26914	2.4447	0.860653	0.0756739	4.40237	2.05762	0.139347	1.50075	6.17634	0.860653
2007-06-04	12	Don Mario	Control	683	4095	3412	0.833	230	61200	0.05	786	0.1	886	0.3	1274	2	2121	30	3562	3.476	683	569.083	329.241	113.917	346.168	2075.49	0.166789	13.98	11.6453	10.9525	2.33466	0.940504	0.0715309	4.99561	5.64879	0.0594959	0.692849	15.8079	0.940504
2007-06-04	12	Don Mario	Control	587	3782	3195	0.845	290	73200	0.05	660	0.1	726	0.3	1024	2	1825	30	3090	5.148	587	495.892	303.744	91.108	351.21	2262.82	0.155209	14.8823	12.5755	12.0284	2.30676	0.956495	0.0671939	5.44293	8.04084	0.0435055	0.547105	21.9856	0.956495
2007-06-04	12	Don Mario	Control	621	3886	3265	0.84	500	80200	0.05	699	0.1	772	0.3	1076	2	1905	30	3198	4.808	621	521.761	316.573	99.239	368.1	2303.44	0.159804	14.3488	12.053	11.4956	2.29581	0.953752	0.0696923	5.25765	7.55645	0.0462481	0.557427	20.6225	0.953752
2007-06-04	12	Don Mario	Control	646	4020	3374	0.839	290	62400	0.05	746	0.1	837	0.3	1231	2	2120	30	3489	3.559	646	542.19	305.323	103.81	341.533	2125.33	0.160697	14.6023	12.2513	11.5578	2.35097	0.943391	0.0684825	5.22291	5.96067	0.0566094	0.693539	16.6649	0.943391
2007-06-04	12	Don Mario	Control	642	4012	3370	0.84	260	62400	0.05	755	0.1	853	0.3	1279	2	2185	30	3436	3.162	642	539.267	292.356	102.733	326.566	2040.78	0.16002	14.376	12.0758	11.3197	2.30016	0.937389	0.0695604	5.24922	5.46669	0.0626113	0.756083	14.9716	0.937389
2007-06-04	12	Don Mario	Control	638	3906	3268	0.837	300	70000	0.05	731	0.1	820	0.3	1173	2	1953	30	3307	3.911	638	533.79	319	104.21	328.007	2008.14	0.163338	14.0481	11.7582	11.1034	2.28984	0.944308	0.0711841	5.12226	6.18257	0.0556916	0.654835	16.956	0.944308
2007-06-04	12	Don Mario	Control	631	3828	3197	0.835	290	60200	0.05	706	0.1	771	0.3	1072	2	1963	30	3341	4.474	631	526.987	307.423	104.013	397.929	2414.06	0.164838	15.0898	12.6	12.0482	2.48982	0.956209	0.0662698	5.06656	7.33156	0.0437911	0.551767	21.8357	0.956209
2007-06-08	16	Don Mario	1-MCP	870	4095	3225	0.788	250	45400	0.05	1061	0.1	1260	0.3	1845	2	2626	30	3758	1.1	870	685.165	312.095	184.835	308.5	1452.08	0.212454	12.6904	10	8.7907	2.69036	0.87907	0.0788	3.7069	2.12337	0.12093	1.2093	7.26923	0.87907
2007-06-08	16	Don Mario	1-MCP	664	4034	3370	0.835	400	66000	0.05	742	0.1	815	0.3	1137	2	2052	30	3497	4.442	664	554.705	326.239	109.295	406.94	2472.28	0.164601	15.0058	12.5298	11.9684	2.47595	0.955193	0.0666411	5.0753	7.21021	0.0448071	0.561424	21.3179	0.955193
2007-06-08	16	Don Mario	1-MCP	682	3885	3203	0.824	300	59200	0.05	781	0.1	871	0.3	1242	2	2074	30	3390	3.13	682	562.277	317.916	119.723	349.415	1990.44	0.175547	14.3833	11.8519	11.1525	2.53146	0.940993	0.069525	4.69648	5.20709	0.0590072	0.699344	15.9471	0.940993
2007-06-08	16	Don Mario	1-MCP	571	3687	3116	0.845	290	59200	0.05	662	0.1	744	0.3	1117	2	1978	30	3177	3.609	571	482.57	264.67	88.43	310.887	2007.42	0.154868	14.94	12.6243	11.9234	2.3157	0.94448	0.0669345	5.45709	6.21378	0.0555199	0.700899	17.0116	0.94448
2007-06-08	16	Don Mario	1-MCP	683	4060	3377	0.832	300	68000	0.05	770	0.1	853	0.3	1194	2	2040	30	3443	4.064	683	568.101	339.818	114.899	377.159	2241.97	0.168227	14.4514	12.0235	11.4183	2.42783	0.949659	0.0691977	4.94436	6.45434	0.0503405	0.605271	18.8647	0.949659
2007-06-08	16	Don Mario	1-MCP	683	4095	3412	0.833	130	38600	0.05	785	0.1	875	0.3	1269	2	2230	30	3737	3.312	683	569.083	311.061	113.917	375.585	2251.86	0.166789	14.6559	12.2083	11.5213	2.44753	0.943728	0.0682321	4.99561	5.71652	0.056272	0.686987	16.7708	0.943728
2007-06-08	16	Don Mario	1-MCP	730	3862	3132	0.811	290	48000	0.05	863	0.1	987	0.3	1440	2	2287	30	3495	1.93	730	592.015	297.708	137.985	324.566	1717.09	0.189021	13.6259	11.0506	10.1438	2.57529	0.917944	0.0733898	4.29041	3.5224	0.0820562	0.906769	11.1868	0.917944
2007-06-08	16	Don Mario	1-MCP	617	3708	3091	0.834	250	41800	0.05	752	0.1	877	0.3	1357	2	2233	30	3317	2.081	617	514.333	245.436	102.667	280.798	1687.52	0.166397	13.6506	11.3846	10.427	2.266	0.915885	0.0732568	5.00972	3.99602	0.0841152	0.957619	10.8885	0.915885
2007-06-08	16	Don Mario	AOA	602	3743	3141	0.839	280	61200	0.05	708	0.1	807	0.3	1195	2	2071	30	3184	3.086	602	505.178	268.914	96.822	312.861	1945.25	0.160834	13.7911	11.5707	10.8156	2.22037	0.934734	0.0725105	5.21761	5.41845	0.0652658	0.755174	14.322	0.934734
2007-06-08	16	Don Mario	AOA	743	4095	3352	0.819	190	49400	0.05	872	0.1	988	0.3	1477	2	2539	30	3660	1.957	743	608.189	282.322	134.811	372.04	2050.47	0.181441	14.6321	11.9837	11.1078	2.64841	0.926909	0.068343	4.51144	3.91007	0.0730907	0.875895	12.6816	0.926909
2007-06-08	16	Don Mario	AOA	646	3833	3187	0.831	290	62200	0.05	735	0.1	819	0.3	1158	2	2029	30	3243	3.613	646	537.125	304.04	108.875	362.717	2152.16	0.168536	14.2457	11.8382	11.1955	2.40752	0.945717	0.0701968	4.93344	6.03342	0.054283	0.642611	17.422	0.945717
2007-06-08	16	Don Mario	AOA	776	4008	3232	0.806	300	53400	0.05	918	0.1	1050	0.3	1550	2	2486	30	3550	1.651	776	625.756	294.679	150.244	345.621	1785.12	0.193613	14.0189	11.2993	10.3413	2.71968	0.915223	0.071332	4.16495	3.20732	0.0847772	0.957921	10.7956	0.915223
2007-06-08	16	Don Mario	AOA	731	3961	3230	0.815	300	53400	0.05	853	0.1	969	0.3	1407	2	2318	30	3560	2.189	731	596.094	303.215	134.906	349.853	1895.71	0.184549	13.9403	11.3613	10.5242	2.57896	0.926316	0.0717345	4.4186	3.98472	0.0736842	0.837152	12.5714	0.926316
2007-06-08	16	Don Mario	AOA	662	3771	3109	0.824	400	54800	0.05	757	0.1	844	0.3	1202	2	2056	30	3349	3.074	662	545.786	301.069	116.214	352.234	2006.46	0.17555	14.4031	11.8681	11.1734	2.53494	0.94146	0.0694296	4.69637	5.24395	0.0585397	0.694757	16.0824	0.94146
2007-06-08	16	Don Mario	AOA	596	3799	3203	0.843	300	69400	0.05	665	0.1	728	0.3	1010	2	1813	30	3229	5.434	596	502.497	311.57	93.503	369.287	2353.9	0.156883	14.8819	12.5455	12.0284	2.33646	0.958789	0.0671957	5.37416	8.40152	0.0412114	0.517015	23.2652	0.958789
2007-06-08	16	Don Mario	AOA	737	4011	3274	0.816	290	49400	0.05	878	0.1	1020	0.3	1490	2	2305	30	3552	2.054	737	601.58	313.468	135.42	313.173	1704.39	0.183745	13.043	10.6431	9.72313	2.39992	0.913561	0.0766693	4.44233	3.59967	0.0864386	0.919976	10.5689	0.913561
2007-06-08	16	Don Mario	Control	565	3693	3128	0.847	280	66600	0.05	632	0.1	698	0.3	976	2	1766	30	3126	5.496	565	478.559	294.816	86.441	349.605	2285.11	0.152992	14.5937	12.3609	11.8353	2.23284	0.957481	0.0685225	5.53628	8.54273	0.0425192	0.525575	22.5188	0.957481
2007-06-08	16	Don Mario	Control	662	4023	3361	0.835	300	75000	0.05	744	0.1	819	0.3	1140	2	1963	30	3408	4.57	662	553.065	338.981	108.935	376.327	2286.96	0.164554	14.5848	12.1783	11.6095	2.4065	0.953288	0.0685643	5.07704	7.10398	0.0467123	0.568878	20.4076	0.953288
2007-06-08	16	Don Mario	Control	728	4095	3367	0.822	100	25000	0.05	823	0.1	907	0.3	1291	2	2320	30	3903	2.997	728	598.578	315.556	129.422	423.151	2380.22	0.177778	15.3054	12.581	11.9122	2.72435	0.946837	0.0653366	4.625	5.38187	0.0531631	0.668845	17.8101	0.946837
2007-06-08	16	Don Mario	Control	612	3965	3353	0.846	290	72600	0.05	688	0.1	763	0.3	1068	2	1853	30	3245	5.365	612	517.537	325.988	94.463	352.118	2281.29	0.154351	14.2783	12.0795	11.5355	2.19886	0.954966	0.0700362	5.47876	8.13671	0.0450343	0.54399	21.2053	0.954966
2007-06-08	16	Don Mario	Control	607	3910	3303	0.845	260	63800	0.05	688	0.1	765	0.3	1088	2	1883	30	3288	4.843	607	512.768	314.677	94.232	340.068	2190.55	0.155243	14.4109	12.1772	11.5947	2.23369	0.952165	0.0693919	5.44152	7.51609	0.0478353	0.582501	19.9051	0.952165
2007-06-08	16	Don Mario	Control	691	4025	3334	0.828	280	60800	0.05	795	0.1	903	0.3	1285	2	2066	30	3452	3.295	691	572.371	336.315	118.629	331.233	1929.4	0.171677	13.5357	11.2075	10.4949	2.32814	0.936413	0.0738788	4.82489	5.24934	0.0635873	0.712657	14.7264	0.936413
2007-06-08	16	Don Mario	Control	619	3448	2829	0.82	260	41200	0.05	707	0.1	785	0.3	1114	2	1914	30	3079	2.905	619	507.874	275.39	111.126	332.17	1850.28	0.179524	14.546	11.9277	11.2278	2.61828	0.941322	0.0687475	4.57027	5.04037	0.058678	0.699894	16.0422	0.941322
2007-06-08	16	Don Mario	Control	658	3465	2807	0.81	240	42600	0.05	739	0.1	810	0.3	1125	2	1919	30	3076	2.86	658	533.046	293.584	124.954	359.835	1894.88	0.189899	0.810101	0.0541503	0.94585	0.665479	15.1703	12.2895	11.624	2.88082	0.0659183	0.810101	4.26596	12.2895
2007-06-08	16	Don Mario	Control	645	3848	3203	0.832	270	58000	0.05	749	0.1	843	0.3	1231	2	2024	30	3287	3.217	645	536.885	305.738	108.115	315.855	1884.36	0.16762	0.83238	0.061817	0.938183	0.731814	14.2223	11.8384	11.1066	2.38394	0.070312	0.83238	4.96589	11.8384

## Sheet: Rosenka2006
Date	Time	ID	Treatment	Fo	Fm	Fv	Fv/Fm	Tfm ms	Area	T1 ms	F1	T2 ms	F2	T3 ms	F3	T4 ms	F4	T5 ms	F5	P.I.	ABS/CS	TRo/CS	ETo/CS	DIo/CS	RC/CSo	RC/CSm
2006-05-24	0	Rosenka	Control	646	3466	2820	0.814	500	68600	0.05	721	0.1	787	0.3	1065	2	1769	30	2920	3.596	646	525.597	316.29	120.403	352.175	1889.54
2006-05-24	0	Rosenka	Control	526	3670	3144	0.857	400	86400	0.05	573	0.1	617	0.3	815	2	1529	30	2931	9.484	526	450.611	306.857	75.389	390.972	2727.88
2006-05-24	0	Rosenka	Control	550	3619	3069	0.848	500	90000	0.05	607	0.1	657	0.3	885	2	1623	30	2876	7.049	550	466.413	303.343	83.587	373.479	2457.49
2006-05-24	0	Rosenka	Control	540	3622	3082	0.851	400	86600	0.05	591	0.1	638	0.3	839	2	1561	30	2904	8.369	540	459.492	307.272	80.508	392.259	2631.04
2006-05-24	0	Rosenka	Control	631	3598	2967	0.825	600	92600	0.05	696	0.1	757	0.3	1015	2	1782	30	2853	4.584	631	520.338	318.481	110.662	389.915	2223.32
2006-05-24	0	Rosenka	Control	578	3484	2906	0.834	400	85600	0.05	640	0.1	700	0.3	948	2	1713	30	2842	5.018	578	482.109	293.811	95.891	369.726	2228.59
2006-05-24	0	Rosenka	Control	520	3668	3148	0.858	400	84400	0.05	568	0.1	613	0.3	822	2	1614	30	2953	8.834	520	446.281	291.189	73.719	404.165	2850.92
2006-05-24	0	Rosenka	Control	578	3610	3032	0.84	500	84000	0.05	629	0.1	682	0.3	906	2	1645	30	2900	6.599	578	485.456	314.618	92.544	394.803	2465.81
2006-05-24	0	Rosenka	Control	530	3608	3078	0.853	600	110200	0.05	580	0.1	624	0.3	838	2	1588	30	2781	8.123	530	452.145	296.729	77.855	388.287	2643.28
2006-05-24	0	Rosenka	Control	560	3843	3283	0.854	400	85800	0.05	623	0.1	678	0.3	949	2	1837	30	3115	6.457	560	478.397	292.313	81.603	392.618	2694.34
2006-06-01	8	Rosenka	Control	574	3624	3050	0.842	700	94800	0.05	636	0.1	692	0.3	936	2	1656	30	2804	6.078	574	483.085	311.709	90.915	360.979	2279.07
2006-06-01	8	Rosenka	Control	591	4053	3462	0.854	600	96400	0.05	655	0.1	715	0.3	976	2	1761	30	3169	7.447	591	504.822	334.215	86.178	383.533	2630.22
2006-06-01	8	Rosenka	Control	627	3501	2874	0.821	600	85400	0.05	685	0.1	740	0.3	941	2	1452	30	2742	6.139	627	514.71	366.959	112.29	338.085	1887.78
2006-06-01	8	Rosenka	Control	582	3797	3215	0.847	600	77800	0.05	659	0.1	730	0.3	1031	2	1888	30	3100	4.972	582	492.792	292.609	89.208	358.344	2337.86
2006-06-01	8	Rosenka	AOA	693	3704	3011	0.813	900	80600	0.05	779	0.1	861	0.3	1158	2	1905	30	3027	3.416	693	563.343	336.584	129.657	367.082	1962.01
2006-06-01	8	Rosenka	AOA	614	3261	2647	0.812	800	96400	0.05	660	0.1	701	0.3	860	2	1297	30	2435	6.984	614	498.393	369.793	115.607	345.937	1837.3
2006-06-01	8	Rosenka	AOA	534	3515	2981	0.848	700	110800	0.05	582	0.1	621	0.3	820	2	1492	30	2576	8.372	534	452.875	307.335	81.125	379.243	2496.33
2006-06-01	8	Rosenka	AOA	580	3460	2880	0.832	800	96200	0.05	634	0.1	683	0.3	899	2	1597	30	2703	6.035	580	482.775	312.295	97.225	384.782	2295.42
2006-06-01	8	Rosenka	AOA	731	3619	2888	0.798	700	81800	0.05	812	0.1	890	0.3	1177	2	1942	30	2995	2.964	731	583.346	338.736	147.654	395.982	1960.41
2006-06-05	12	Rosenka	Control	671	3898	3227	0.828	600	70000	0.05	775	0.1	869	0.3	1275	2	2303	30	3484	2.628	671	555.494	274.563	115.506	375.235	2179.83
2006-06-05	12	Rosenka	Control	533	3533	3000	0.849	600	78800	0.05	594	0.1	651	0.3	919	2	1741	30	2938	5.547	533	452.59	270.347	80.41	354.099	2347.15
2006-06-05	12	Rosenka	Control	520	3514	2994	0.852	600	84800	0.05	578	0.1	631	0.3	886	2	1706	30	2870	6.058	520	443.051	267.547	76.949	358.919	2425.47
2006-06-05	12	Rosenka	Control	590	3595	3005	0.836	700	76400	0.05	664	0.1	729	0.3	1028	2	1872	30	3108	4.187	590	493.171	282.773	96.829	360.871	2198.86
2006-06-05	12	Rosenka	Control	693	3843	3150	0.82	700	78800	0.05	801	0.1	906	0.3	1278	2	2087	30	3339	2.796	693	568.033	316.656	124.967	338.392	1876.54
2006-06-05	12	Rosenka	Control	590	3701	3111	0.841	600	84800	0.05	661	0.1	729	0.3	1009	2	1783	30	3132	5.072	590	495.944	305.761	94.056	353.02	2214.45
2006-06-05	12	Rosenka	Control	587	3632	3045	0.838	700	68400	0.05	666	0.1	738	0.3	1042	2	1830	30	3154	4.306	587	492.13	291.237	94.87	336.108	2079.64
2006-06-05	12	Rosenka	Control	537	3676	3139	0.854	600	97000	0.05	591	0.1	634	0.3	850	2	1603	30	2976	8.265	537	458.554	302.829	78.446	390.43	2672.66
2006-06-05	12	Rosenka	Control	547	3502	2955	0.844	700	72000	0.05	608	0.1	665	0.3	913	2	1663	30	3024	5.726	547	461.561	287.245	85.439	351.845	2252.58
2006-06-05	12	Rosenka	Control	558	3789	3231	0.853	600	84800	0.05	620	0.1	677	0.3	937	2	1724	30	3161	6.726	558	475.824	304.109	82.176	365.97	2485.06
2006-06-05	12	Rosenka	AOA	659	3678	3019	0.821	600	62400	0.05	753	0.1	840	0.3	1180	2	2033	30	3275	2.968	659	540.925	294.74	118.075	356.637	1990.45
2006-06-05	12	Rosenka	AOA	593	3612	3019	0.836	700	79600	0.05	663	0.1	732	0.3	1001	2	1718	30	3067	4.938	593	495.644	310.947	97.356	341.667	2081.11
2006-06-05	12	Rosenka	AOA	624	3571	2947	0.825	600	80000	0.05	698	0.1	761	0.3	1050	2	1843	30	3022	3.952	624	514.962	301.952	109.038	368.391	2108.21
2006-06-05	12	Rosenka	AOA	735	3283	2548	0.776	900	76600	0.05	822	0.1	913	0.3	1193	2	1833	30	2818	2.13	735	570.448	324.627	164.552	341.895	1527.13
2006-06-05	12	Rosenka	AOA	504	3021	2517	0.833	600	76600	0.05	552	0.1	598	0.3	802	2	1404	30	2380	5.644	504	419.917	269.768	84.083	317.051	1900.42
2006-06-07	14	Rosenka	Control	589	3711	3122	0.841	600	77800	0.05	657	0.1	718	0.3	1017	2	1920	30	3202	4.665	589	495.515	284.263	93.485	385.24	2427.21
2006-06-07	14	Rosenka	Control	577	3559	2982	0.838	600	82200	0.05	652	0.1	717	0.3	1031	2	1948	30	2996	3.841	577	483.454	261.182	93.546	364.987	2251.28
2006-06-07	14	Rosenka	Control	541	3540	2999	0.847	500	75400	0.05	604	0.1	660	0.3	933	2	1838	30	2980	5.098	541	458.322	260.108	82.678	379.109	2480.68
2006-06-07	14	Rosenka	Control	657	3573	2916	0.816	700	74200	0.05	720	0.1	780	0.3	998	2	1567	30	2997	5.327	657	536.191	368.861	120.809	357.723	1945.42
2006-06-07	14	Rosenka	Control	650	3808	3158	0.829	900	123400	0.05	733	0.1	808	0.3	1135	2	2019	30	3281	3.716	650	539.049	305.37	110.951	380.391	2228.51
2006-06-07	14	Rosenka	Control	545	3526	2981	0.845	700	86800	0.05	600	0.1	648	0.3	881	2	1623	30	2901	6.548	545	460.761	294.139	84.239	369.569	2391.01
2006-06-07	14	Rosenka	Control	596	3763	3167	0.842	600	76000	0.05	675	0.1	749	0.3	1057	2	1872	30	3237	4.586	596	501.603	299.505	94.397	347.096	2191.48
2006-06-07	14	Rosenka	Control	575	3572	2997	0.839	700	67200	0.05	658	0.1	735	0.3	1045	2	1828	30	3147	4.057	575	482.44	280.739	92.56	321.541	1997.47
2006-06-07	14	Rosenka	Control	796	3379	2583	0.764	900	47200	0.05	881	0.1	970	0.3	1246	2	1774	30	3101	2.212	796	608.484	378.094	187.516	330.61	1403.43
2006-06-07	14	Rosenka	Control	585	3508	2923	0.833	700	78000	0.05	650	0.1	710	0.3	967	2	1695	30	2985	4.94	585	487.444	302.339	97.556	354.099	2123.38
2006-06-07	14	Rosenka	AOA	874	3903	3029	0.776	600	64400	0.05	1029	0.1	1202	0.3	1660	2	2445	30	3465	1.247	874	678.285	326.49	195.715	338.927	1513.54
2006-06-07	14	Rosenka	AOA	622	3490	2868	0.822	700	73600	0.05	711	0.1	795	0.3	1114	2	1888	30	3014	3.084	622	511.145	285.514	110.855	328.816	1844.96
2006-06-07	14	Rosenka	AOA	620	3505	2885	0.823	600	71600	0.05	703	0.1	780	0.3	1075	2	1810	30	3025	3.567	620	510.328	299.829	109.672	333.676	1886.35
2006-06-07	14	Rosenka	AOA	553	3440	2887	0.839	700	89000	0.05	608	0.1	658	0.3	879	2	1556	30	2821	6.33	553	464.102	302.864	88.898	356.974	2220.6

## Sheet: Don Mario2006
Date	Time	ID	Treatment	Fo	Fm	Fv	Fv/Fm	Tfm ms	Area	T1 ms	F1	T2 ms	F2	T3 ms	F3	T4 ms	F4	T5 ms	F5	P.I.	ABS/CS	TRo/CS	ETo/CS	DIo/CS	RC/CSo	RC/CSm
2006-05-24	0	Don Mario	Control	620	4095	3475	0.849	190	80800	0.05	689	0.1	757	0.3	1049	2	1985	30	3316	5.848	620	526.129	319.463	93.871	418.512	2764.2
2006-05-24	0	Don Mario	Control	674	4001	3327	0.832	250	70400	0.05	785	0.1	896	0.3	1334	2	2338	30	3319	2.586	674	560.459	280.145	113.541	353.259	2097.02
2006-05-24	0	Don Mario	Control	609	4095	3486	0.851	280	90400	0.05	693	0.1	770	0.3	1102	2	2076	30	3412	4.989	609	518.431	300.262	90.569	385.668	2593.29
2006-05-24	0	Don Mario	Control	652	4095	3443	0.841	400	102600	0.05	741	0.1	825	0.3	1168	2	2047	30	3254	4.405	652	548.189	326.08	103.811	370.506	2327.03
2006-05-24	0	Don Mario	Control	584	4080	3496	0.857	290	85400	0.05	648	0.1	703	0.3	961	2	1815	30	3224	7.704	584	500.408	324.206	83.592	408.489	2853.83
2006-05-24	0	Don Mario	Control	545	3807	3262	0.857	290	73800	0.05	619	0.1	684	0.3	984	2	1835	30	3082	5.759	545	466.979	282.306	78.021	343.054	2396.34
2006-05-24	0	Don Mario	Control	737	4095	3358	0.82	110	33600	0.05	925	0.1	1107	0.3	1749	2	2709	30	3702	1.279	737	604.358	249.446	132.642	294.416	1635.86
2006-05-24	0	Don Mario	Control	582	4073	3491	0.857	180	67000	0.05	660	0.1	730	0.3	1050	2	1981	30	3268	5.745	582	498.837	298.931	83.163	372.795	2608.93
2006-05-24	0	Don Mario	Control	742	4095	3353	0.819	130	40600	0.05	906	0.1	1064	0.3	1642	2	2574	30	3634	1.563	742	607.552	275.6	134.448	309.177	1706.3
2006-05-24	0	Don Mario	Control	638	4095	3457	0.844	90	32800	0.05	746	0.1	843	0.3	1249	2	2291	30	3771	3.376	638	538.6	281.063	99.4	364.282	2338.14
2006-06-01	8	Don Mario	AOA	711	3410	2699	0.791	600	57800	0.05	798	0.1	885	0.3	1186	2	1901	30	2838	2.386	711	562.753	314.633	148.247	352.461	1690.43
2006-06-01	8	Don Mario	AOA	663	3522	2859	0.812	290	56600	0.05	730	0.1	796	0.3	1019	2	1551	30	2964	4.845	663	538.193	371.032	124.807	335.615	1782.86
2006-06-01	8	Don Mario	AOA	583	3586	3003	0.837	700	87000	0.05	649	0.1	711	0.3	971	2	1738	30	2711	5.136	583	488.218	300.442	94.782	363.332	2234.84
2006-06-01	8	Don Mario	AOA	694	3113	2419	0.777	700	63600	0.05	784	0.1	872	0.3	1198	2	1935	30	2566	1.583	694	539.282	262.619	154.718	331.969	1489.08
2006-06-01	8	Don Mario	AOA	743	2737	1994	0.729	700	52000	0.05	802	0.1	865	0.3	1062	2	1497	30	2310	1.9	743	541.301	336.617	201.699	319.86	1178.27
2006-06-01	8	Don Mario	Control	598	3984	3386	0.85	600	84200	0.05	672	0.1	739	0.3	1029	2	1883	30	3237	5.865	598	508.24	315.361	89.76	378.822	2523.79
2006-06-01	8	Don Mario	Control	804	3754	2950	0.786	300	54800	0.05	896	0.1	989	0.3	1290	2	1914	30	3236	2.729	804	631.806	394.076	172.194	360.753	1684.41
2006-06-01	8	Don Mario	Control	672	3794	3122	0.823	700	55600	0.05	784	0.1	887	0.3	1297	2	2228	30	3249	2.395	672	552.974	277.373	119.026	344.171	1943.13
2006-06-01	8	Don Mario	Control	688	4095	3407	0.832	110	36400	0.05	809	0.1	925	0.3	1394	2	2549	30	3695	2.256	688	572.409	259.743	115.591	377.214	2245.19
2006-06-01	8	Don Mario	Control	684	4091	3407	0.833	800	62200	0.05	802	0.1	914	0.3	1355	2	2344	30	3499	2.7	684	569.638	292.092	114.362	352.309	2107.16
2006-06-05	12	Don Mario	Control	577	3817	3240	0.849	600	103400	0.05	635	0.1	689	0.3	949	2	1895	30	3075	6.157	577	489.777	290.541	87.223	433.822	2869.84
2006-06-05	12	Don Mario	Control	575	3802	3227	0.849	600	85000	0.05	641	0.1	697	0.3	983	2	1950	30	3195	5.406	575	488.039	280.089	86.961	411.185	2718.83
2006-06-05	12	Don Mario	Control	565	3968	3403	0.858	600	103800	0.05	636	0.1	700	0.3	988	2	1886	30	3248	6.356	565	484.55	296.454	80.45	378.304	2656.83
2006-06-05	12	Don Mario	Control	647	3946	3299	0.836	600	107200	0.05	702	0.1	754	0.3	953	2	1551	30	3096	8.341	647	540.916	392.693	106.084	399.5	2436.52
2006-06-05	12	Don Mario	Control	550	3859	3309	0.857	600	104600	0.05	615	0.1	673	0.3	942	2	1824	30	3101	6.695	550	471.612	290.036	78.388	383.185	2688.56
2006-06-05	12	Don Mario	Control	537	3747	3210	0.857	600	112000	0.05	586	0.1	630	0.3	839	2	1640	30	2926	8.932	537	460.04	301.964	76.96	420.053	2930.99
2006-06-05	12	Don Mario	Control	573	3893	3320	0.853	600	102400	0.05	633	0.1	687	0.3	940	2	1846	30	3160	6.89	573	488.662	301.292	84.338	423.751	2878.99
2006-06-05	12	Don Mario	Control	574	4034	3460	0.858	400	82800	0.05	651	0.1	716	0.3	1042	2	2070	30	3445	5.424	574	492.325	279.459	81.675	393.439	2765.04
2006-06-05	12	Don Mario	Control	637	4095	3458	0.844	290	91800	0.05	697	0.1	752	0.3	1014	2	1938	30	3288	6.557	637	537.911	335.533	99.089	464.073	2983.33
2006-06-05	12	Don Mario	Control	614	4092	3478	0.85	700	113200	0.05	678	0.1	736	0.3	1008	2	1912	30	3282	6.66	614	521.87	327.107	92.13	429.814	2864.49
2006-06-05	12	Don Mario	AOA	591	3795	3204	0.844	600	105600	0.05	657	0.1	716	0.3	982	2	1853	30	3086	5.683	591	498.963	302.43	92.037	402.616	2585.32
2006-06-05	12	Don Mario	AOA	678	4095	3417	0.834	90	27000	0.05	781	0.1	873	0.3	1300	2	2419	30	3886	2.833	678	565.745	277.492	112.255	395.885	2391.08
2006-06-05	12	Don Mario	AOA	1522	3347	1825	0.545	900	25600	0.05	1749	0.1	2031	0.3	2584	2	3115	30	3205	0.036	1522	829.892	105.499	692.108	311.21	684.375
2006-06-05	12	Don Mario	AOA	628	4021	3393	0.844	500	90600	0.05	697	0.1	758	0.3	1060	2	2107	30	3361	5.05	628	529.919	298.929	98.081	453.559	2904.08
2006-06-07	14	Don Mario	Control	573	3895	3322	0.853	700	114400	0.05	637	0.1	690	0.3	958	2	1864	30	3109	6.521	573	488.705	298.784	84.295	409.687	2784.87
2006-06-07	14	Don Mario	Control	531	3659	3128	0.855	600	90000	0.05	589	0.1	640	0.3	885	2	1746	30	3012	6.803	531	453.94	277.618	77.06	389.504	2683.98
2006-06-07	14	Don Mario	Control	593	4058	3465	0.854	600	100200	0.05	668	0.1	733	0.3	1033	2	2004	30	3346	5.823	593	506.344	300.153	86.656	405.938	2777.91
2006-06-07	14	Don Mario	Control	557	3713	3156	0.85	700	103800	0.05	615	0.1	668	0.3	923	2	1791	30	2985	6.323	557	473.442	288.326	83.558	399.063	2660.18
2006-06-07	14	Don Mario	Control	608	4078	3470	0.851	700	108200	0.05	666	0.1	720	0.3	959	2	1781	30	3312	7.945	608	517.352	342.466	90.648	432.232	2899.08
2006-06-07	14	Don Mario	Control	531	3807	3276	0.861	700	109400	0.05	584	0.1	631	0.3	859	2	1708	30	3046	8.494	531	456.936	292.768	74.064	409.919	2938.91
2006-06-07	14	Don Mario	Control	526	3552	3026	0.852	700	97600	0.05	580	0.1	628	0.3	857	2	1654	30	2876	7.026	526	448.107	281.066	77.893	381.771	2578.04
2006-06-07	14	Don Mario	Control	604	3995	3391	0.849	400	77800	0.05	707	0.1	799	0.3	1195	2	2201	30	3412	3.616	604	512.682	271.233	91.318	346.342	2290.79
2006-06-07	14	Don Mario	Control	584	3753	3169	0.844	700	112400	0.05	640	0.1	691	0.3	898	2	1569	30	2936	7.967	584	493.124	339.85	90.876	386.726	2485.24
2006-06-07	14	Don Mario	Control	568	3861	3293	0.853	600	94400	0.05	623	0.1	669	0.3	914	2	1839	30	3167	7.224	568	484.44	297.461	83.56	444.887	3024.14
2006-06-07	14	Don Mario	AOA	607	3755	3148	0.838	600	95400	0.05	694	0.1	774	0.3	1106	2	1976	30	3079	3.875	607	508.878	287.577	98.122	349.025	2159.12
2006-06-07	14	Don Mario	AOA	1304	4095	2791	0.682	180	34400	0.05	1552	0.1	1841	0.3	2500	2	3245	30	3741	0.259	1304	888.758	270.672	415.242	360.593	1132.38
2006-06-07	14	Don Mario	AOA	593	3948	3355	0.85	600	95800	0.05	663	0.1	724	0.3	1007	2	1907	30	3268	5.926	593	503.93	306.564	89.07	399.857	2662.12
2006-06-07	14	Don Mario	AOA	687	4095	3408	0.832	220	58800	0.05	803	0.1	914	0.3	1349	2	2383	30	3631	2.669	687	571.745	287.215	115.255	366.193	2182.77
